# Supplementary material
Source: publisher figshare collection journal article supplement (https://gsapubs.figshare.com/articles/dataset/_/14046875)
Supplement: Supplementary file 1 [file 1]

## **Mid-Miocene volcanic migration in the westernmost Sunda arc induced by India-Eurasia collision**

Yu-Ming Lai\*, Sun-Lin Chung\*, Azman A. Ghani, Sayed Murtadha, Hao-Yang Lee,  
Mei-Fei Chu

\*correspondence to: [ymlai@ntnu.edu.tw](mailto:ymlai@ntnu.edu.tw); [sunlin@ntu.edu.tw](mailto:sunlin@ntu.edu.tw)

---

### **<sup>1</sup>Supplemental Material:**

#### **1. Analytical Methods.**

**2. Figure S1.** (A) Summarized age data of Cenozoic igneous rocks in Sumatra; (B) age data < 30 Ma showing volcanic migration in NW Sumatra; (C) age data < 30 Ma from elsewhere in Central and SE Sumatra. Data sources: (1) K-Ar ages from Kanao et al. (1971); De Coster (1974); Hehuwat (1976); Bennett et al. (1981); Eubank and Makki (1981); Cameron et al. (1982); Rock et al. (1983); Koning and Aulia (1985); Wajzer (1986); van Leeuwen et al. (1987); JICA (1988); Kallagher (1990); Sato (1991); Kusnama et al. (1993); McCourt and Cobbing (1993); Wikarno et al. (1993); Amin et al. (1994); Gafoer et al. (1994); Bellon et al. (2004); (2) <sup>40</sup>Ar/<sup>39</sup>Ar and Rb-Sr ages from Imtihanah (2000); (3) zircon U-Pb ages from this study, Lai et al. (2021) and Liu et al. (2021).

**3. Figure S2.** (A) Chondrite-normalized REE diagram for three volcanic suites in NW Sumatra. (B) Primitive mantle-normalized incompatible element variation diagram (or, spidergram) of the volcanic suites. Chondrite and primitive mantle normalizing values are from Sun and McDonough (1989).

**4. Table S1.** Magmatic zircon U-Pb age data from NW Sumatra.

**5. Table S2.** Geochemical and Sr-Nd isotopic data from NW Sumatra.

**6. Table S3.** Detrital zircon U-Pb age data from NW Sumatra (Hsu, 2016, National Taiwan University master thesis).

**7. References cited in supplemental materials.**

## 1. Analytical Methods

A total of 23 volcanic rock samples were collected from NW Sumatra, including 6 samples from the southern coast, 7 and 10 samples from Seulawah Agam and Geureudong volcanoes, respectively. Zircon grains were separated using heavy liquid and magnetic techniques, mounted in epoxy, and then were polished to expose their interior crystals. Cathodoluminescence (CL) images were taken using a scanning electron microscope (SEM) at the Institute of Earth Sciences, Academia Sinica, Taipei. Based on these images, we selected suitable positions for U-Pb dating sites. Zircon U-Pb analyses were performed by using Agilent 7500s inductively coupled plasma mass spectrometer (ICP-MS) attached to a Photon Machines Analyte G2 (PM193) laser ablation system at the Department of Geosciences, National Taiwan University (NTU). The repetition rate was 5 Hz and the analysing beam are about 35  $\mu\text{m}$  in diameter. Calibration were made by standard zircon GJ-1 ( $608.5 \pm 0.4$  Ma, Jackson et al., 2004), and two standard zircons 91500 ( $1062.4 \pm 0.8$  Ma, Wiedenbeck et al., 1995) and Plešovice ( $337.1 \pm 0.4$  Ma, Sláma et al., 2008) for controlling the data quality. Common lead was corrected using the function suggested by Andersen (2002). GLITTER 4.0 (Griffin et al., 2008) and Isoplot v. 4.15 (Ludwig, 2012) were used to calculate weighted mean ages and to plot concordia diagrams. Detailed analytical procedures are similar to Chiu et al. (2009) and the age data are show in Table S1.

Rock samples were crushed, powdered and analyzed their whole rock

geochemical compositions at NTU. Loss on ignition (LOI) were analyzed by routine procedures. Major element data were performed by using a Rigaku RIX2000 X-ray fluorescence (XRF) spectrometer with analytical uncertainties within 5%, and trace element data were measured by using an Agilent 7500cx inductively coupled plasma-mass spectrometer (ICP-MS) with the precision better than 3% (Lin et al., 2012). Geochemical analyses results are show in Table S2.

2. Figure S1

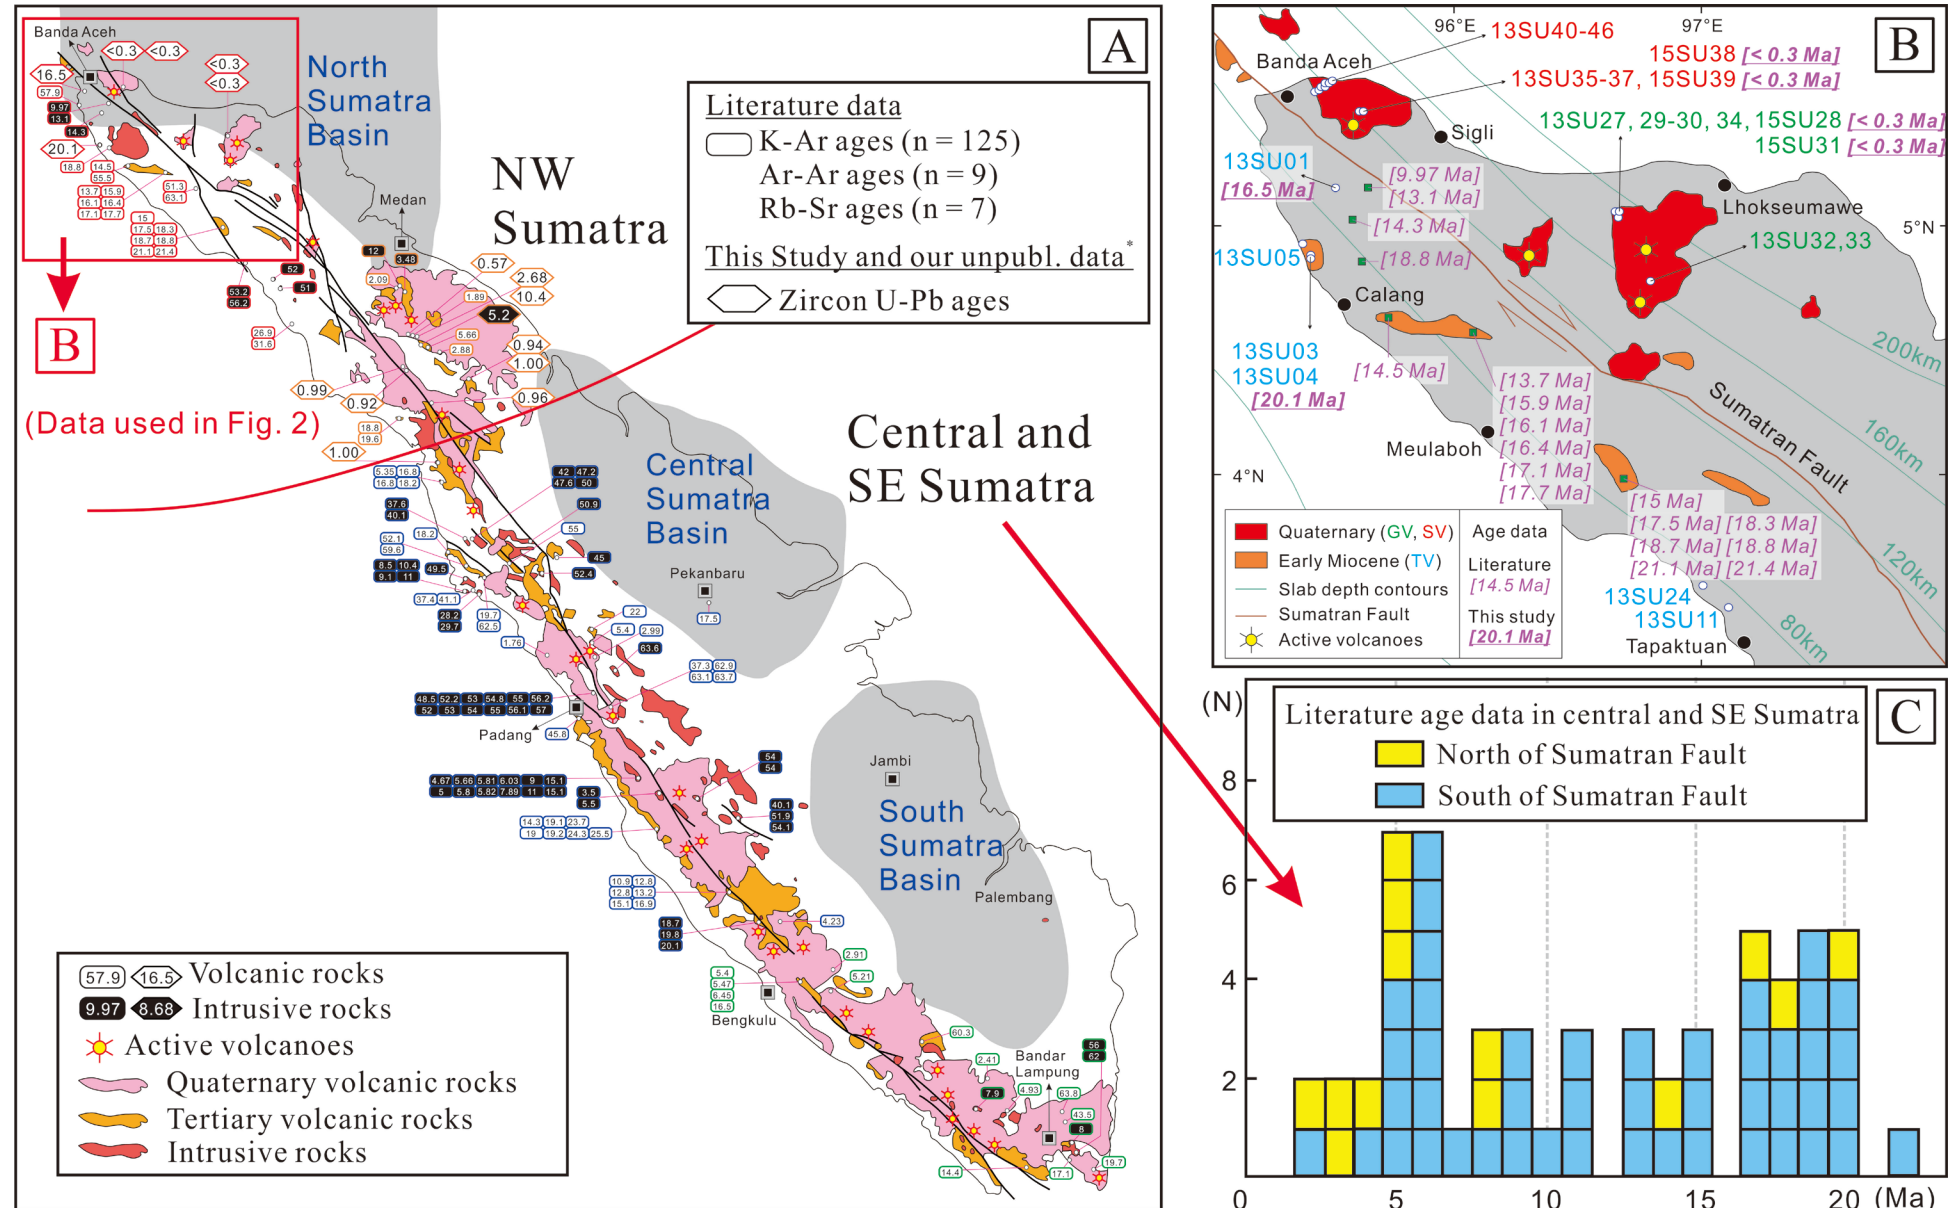

\*Lai, Y.-M., Liu, P.-P., Ghani, A., Lee, H.-Y., Li, S., Murtadha, S., Quek, L.X., Roselee, M.H., Lintjewas, L., and Chung, S.-L., 2021, Zircon U-Pb geochronology and Hf isotopic compositions of the Cenozoic igneous rocks in Sumatra, Indonesia: ms. in prep.

\*Liu, P.-P., Caricchi, L., Chung, S.-L., Li, X.-H., Li, Q., Zhou, M.-F., Ghani, A., Sihotang, T., Sheldrake, T., Simpson, G., and Lai, Y.-M., 2021, Growth and thermal maturation of the Toba magma reservoir: ms. in revision.

3. Figure S2

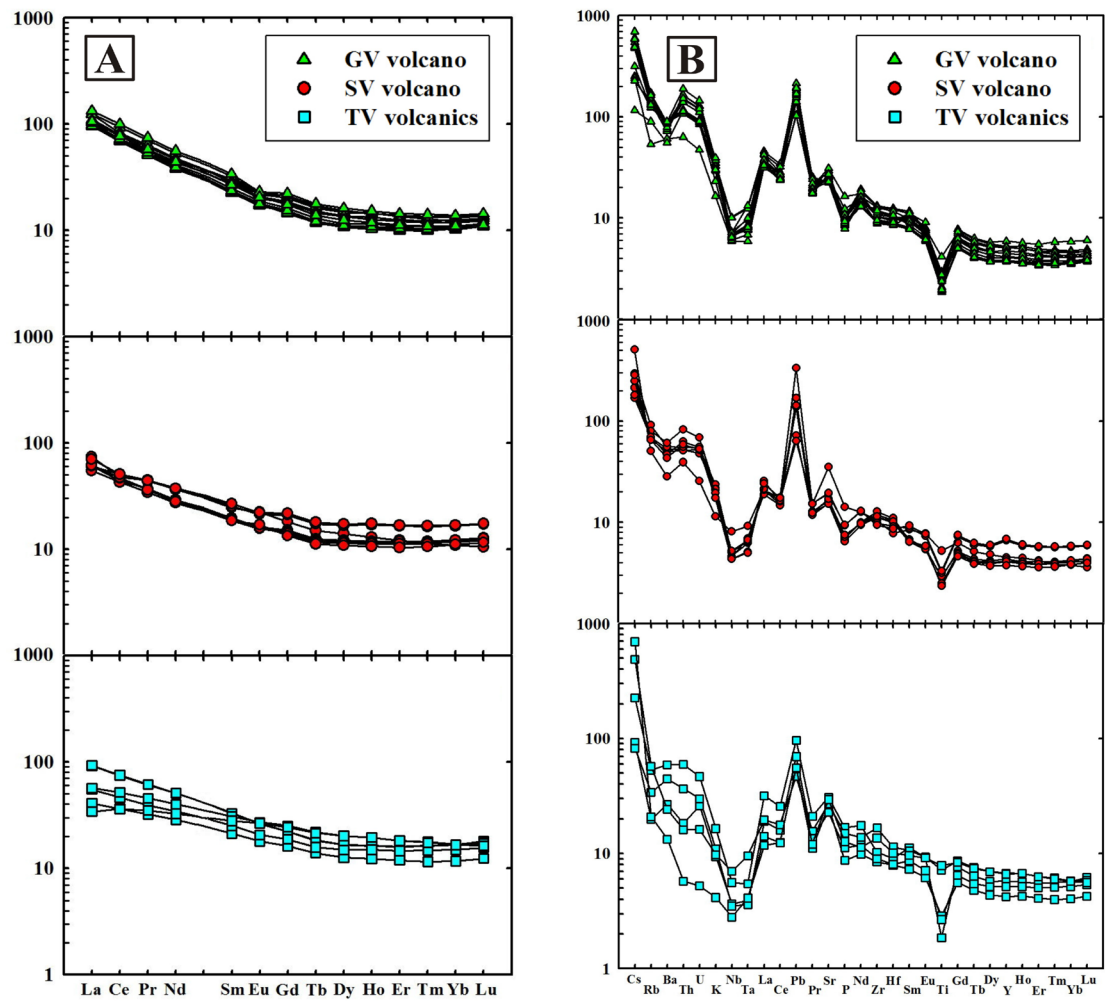

## 7. References

- Amin, T.C., Sidarto Santosa, S., and Gunuwan, W., 1994, The geology of the Kotaagung Quadrangle (1010), Sumatra. Scale 1:250,000. Geological Research and Development Centre, Bandung.
- Andersen, T., 2002, Correction of common lead in U-Pb analyses that do not report  $^{204}\text{Pb}$ : Chemical Geology, v. 192, p. 59-79.
- Bellon, H., Maury, R.C., Sutanto, Soeria-Atmadja, R., Cotten, J., and Polve, M., 2004, 65 m.y.-long magmatic activity in Sumatra (Indonesia), from Paleocene to Present: Bulletin de la Societe Geologique de France, v. 175(1), p. 61-72.
- Bennett, J.D., Bridge, D.McC., Cameron, N R., Djunuddin, A., Ghazali, S.A., Jeffrey, D.H., Kartawa, W., Keats, W., Rock, N.M.S., Thompson, S.J., and Whandoyo, R., 1981, The geology of the Banda Aceh Quadrangle (0421), Sumatra. Scale 1:250,000. Geological Research and Development Centre, Bandung.
- Cameron, N.R., Aspden, J.A., Bridge, D.McC., Djunuddin, A., Ghazali, S.A., Harahap, H., Hariwidjaja, Johari, S., Kartawa, W., Keats, W., Ngabito, H., Rock, N.M.S., and Whandoyo, R., 1982, The geology of the Medan Quadrangle (0619), Sumatra. Scale 1:250,000. Geological Research and Development Centre, Bandung.
- Chiu, H.Y., Chung, S.L., Wu, F.Y., Liu, D.Y., Liang, Y.H., Lin, I.J., Iizuka, Y., Xie, L.W., Wang, Y.B., and Chu, M.F., 2009, Zircon U-Pb and Hf isotopic constraints from eastern Transhimalayan batholiths on the precollisional magmatic and tectonic evolution in southern Tibet: Tectonophysics, v. 477, p. 3-19.
- De Coster, G.G., 1974, The geology of the Central and South Sumatra Basins. In: Indonesian Petroleum Association, Proceedings of the 3<sup>rd</sup> Annual Convention, Jakarta, v. 3, p. 77-110.
- Eubank, R.T. and Makki, A.C., 1981, Structural geology of the Central Sumatra Back-Arc Basin. In: Indonesian Petroleum Association, Proceedings of the 10<sup>th</sup> Annual Convention, Jakarta, v. 10, p. 153-196.
- Gafoer, S., Amin, T.C., and Pardede, R., 1994, The geology of the Baturaja Quadrangle (1011), Sumatra. Scale 1:250,000. Geological Research and

Development Centre, Bandung.

- Griffin, W., Powell, W., Pearson, N., and O'Reilly, S., 2008, GLITTER: data reduction software for laser ablation ICP-MS: Laser Ablation-ICP-MS in the Earth Sciences: Mineralogical Association of Canada Short Course Series, v. 40, p. 204-207.
- Hehuwat, F., 1976, Isotopic age determinations in Indonesia, the state of art, volume. 3. Proc. Seminar on Isotopic Dating, CCOP, Bangkok, p. 135-155.
- Hsu, C.C., 2016, Detrital zircon U-Pb and Hf isotopic study in northwestern Sumatra, Indonesia: Master Thesis, National Taiwan University, p. 1-158.
- Imtihanah, 2000, Isotopic dating of igneous sequences of the Sumatra Fault System: M. Phil thesis, London University.
- Jackson, S.E., Pearson, N.J., Griffin, W.L., and Belousova, E.A., 2004, The application of laser ablation-inductively coupled plasma-mass spectrometry to in situ U-Pb zircon geochronology: Chemical Geology, v. 211, p. 47-69.
- JICA, 1988, Report on the cooperative mineral exploration of Southern Sumatra, Consolidated Report. Japan International Cooperation Agency, Metal Mining Agency of Japan, February 1988.
- Kallagher, H.J., 1990, K-Ar dating of selected igneous samples from the Sibolga Basin, Meulaboh and Simeulue Island, western Sumatra. Lemigas Scientific Contributions on Petroleum Science and Technology, Special Issue, p. 99-111.
- Kanao, N.E.A., 1971, Summary Report on the Survey of Sumatra, Block 5, Japanese Overseas Mineral Development Company Limited. Unpublished manuscript.
- Koning, T. and Aulia, K., 1985, Petroleum geology of the Ombilin Intermontane Basin, West Sumatra. In: Indonesian Petroleum Association, Proceedings of the 14<sup>th</sup> Annual Convention, Jakarta, v. 1, p. 117-137.
- Kusnama, Mangga, S.A., and Sukarna, D., 1993, Tertiary stratigraphy and tectonic evolution of southern Sumatra: Geological Society of Malaysia Bulletin, v. 33, p. 143-152.

- Lai, Y.-M., Liu, P.-P., Ghani, A., Lee, H.-Y., Li, S., Murtadha, S., Quek, L.X., Roselee, M.H., Lintjewas, L., and Chung, S.-L., 2021, Zircon U-Pb geochronology and Hf isotopic compositions of the Cenozoic igneous rocks in Sumatra, Indonesia: ms. in prep.
- Lin, I.J., Chung, S.L., Chu, C.H., Lee, H.Y., Gallet, S., Wu, G., Ji, J., and Zhang, Y., 2012, Geochemical and Sr-Nd isotopic characteristics of Cretaceous to Paleocene granitoids and volcanic rocks, SE Tibet: petrogenesis and tectonic implications: *Journal of Asian Earth Sciences* v. 53, p. 131-150.
- Liu, P.-P., Caricchi, L., Chung, S.-L., Li, X.-H., Li, Q., Zhou, M.-F., Ghani, A., Sihotang, T., Sheldrake, T., Simpson, G., and Lai, Y.-M., 2021, Growth and thermal maturation of the Toba magma reservoir: ms. in revision.
- Ludwig, K.R., 2012, Isoplot 3.75–4.15: A geochronological toolkit for Microsoft Excel: Berkeley Geochronology Center Special Publication, p. 1-75
- McCourt, W.J., Cobbing, E.J., 1993, The geochemistry, geochronology and tectonic setting of granitoid rocks from southern Sumatra, Western Indonesia. Southern Sumatra Geological and Mineral Exploration Project. Project Report Series, 9. Directorate of Mineral Resources/Geological Research and Development Centre, Bandung, Indonesia.
- Rock, N.M.S., Aldiss, D.T., Aspden, J.A., Clarke, M.C.G., Djunuddin, A., Kartawa, W., Miswar, S.J., Thompson, R., and Whandoyo, R., 1983, The geology of the Lubuksikaping Quadrangle (0716), Sumatra. Scale 1:250,000. Geological Research and Development Centre, Bandung.
- Sato, K., 1991, K-Ar ages of granitoids in Central Sumatra, Indonesia: *Bulletin Geological Survey of Japan*, v. 42, p. 111-181.
- Sláma, J., Košler, J., Condon, D.J., Crowley, J.L., Gerdes, A., Hanchar, J.M., Horstwood, M.S.A., Morris, G.A., Nasdala, L., and Norberg, N., 2008, Plešovice zircon - a new natural reference material for U-Pb and Hf isotopic microanalysis: *Chemical Geology*, v. 249, p. 1-35.
- van Leeuwen, T.M., Taylor, R.P., and Hutagalung, J., 1987, The geology of the Tangse



porphyry copper-molybdenum prospect, Aceh, Indonesia: *Economic Geology*, v. 82, p. 27-42.

Wajzer, M.R., 1986, The geology and tectonic evolution of the Woyla Group, Natal area, North Sumatra: PhD thesis, University of London.

Wiedenbeck, M., Allé, P., Corfu, F., Griffin, W.L., Meier, M., Oberli, F., Quadt, A.V., Roddick, J.C., and Spiegel, W., 1995, Three natural zircon standards for U-Th-Pb, Lu-Hf, trace element and REE analyses: *Geostandards and Geoanalytical Research*, v. 19, p. 1-23.

Wikarno, R., Hardjono, f. and Graha, D.S., 1993, Distribution of radiometric ages in Indonesia, scale 1:5000000. Geological Research and Development Centre, Bandung.

4. Table S1

| Spot.            | U (ppm)                    | Th (ppm) | Th/U | U-Th-Pb ratios                      |        |                                      |        |                                     |        | Age (Ma)                            |      |                                      |      |                                     |      | Age (Ma)                            |      |
|------------------|----------------------------|----------|------|-------------------------------------|--------|--------------------------------------|--------|-------------------------------------|--------|-------------------------------------|------|--------------------------------------|------|-------------------------------------|------|-------------------------------------|------|
|                  |                            |          |      | <sup>206</sup> Pb/ <sup>238</sup> U | ± 1σ   | <sup>207</sup> Pb/ <sup>206</sup> Pb | ± 1σ   | <sup>207</sup> Pb/ <sup>235</sup> U | ± 1σ   | <sup>206</sup> Pb/ <sup>238</sup> U | ± 1σ | <sup>207</sup> Pb/ <sup>206</sup> Pb | ± 1σ | <sup>207</sup> Pb/ <sup>235</sup> U | ± 1σ | <sup>206</sup> Pb/ <sup>238</sup> U | ± 1σ |
| Tertiary Volcano |                            |          |      |                                     |        |                                      |        |                                     |        |                                     |      |                                      |      |                                     |      |                                     |      |
| 13SU01           | wt. mean = 16.5 ± 0.5 (2σ) |          |      |                                     |        |                                      |        |                                     |        |                                     |      |                                      |      |                                     |      |                                     |      |
| SU01-01          | 119                        | 64       | 0.53 | 0.0026                              | 0.0001 | 0.0476                               | 0.0049 | 0.0169                              | 0.0021 | 16.5                                | 0.5  | 81                                   | 210  | 17.0                                | 2.0  | 16.5                                | 0.5  |
| SU01-02          | 127                        | 63       | 0.49 | 0.0027                              | 0.0001 | 0.0506                               | 0.0046 | 0.0185                              | 0.0022 | 17.1                                | 0.6  | 221                                  | 205  | 19.0                                | 2.0  | 17.1                                | 0.6  |
| SU01-03          | 155                        | 71       | 0.46 | 0.0026                              | 0.0001 | 0.0461                               | 0.0021 | 0.0168                              | 0.0012 | 17.0                                | 0.8  | 1.0                                  | 88   | 17.0                                | 1.0  | 17.0                                | 0.8  |
| SU01-05          | 117                        | 60       | 0.51 | 0.0026                              | 0.0001 | 0.0559                               | 0.0060 | 0.0199                              | 0.0026 | 16.6                                | 0.5  | 450                                  | 246  | 20.0                                | 3.0  | 16.6                                | 0.5  |
| SU01-06          | 129                        | 64       | 0.50 | 0.0024                              | 0.0001 | 0.0451                               | 0.0047 | 0.0150                              | 0.0020 | 15.6                                | 0.5  | -14                                  | 211  | 15.0                                | 2.0  | 15.6                                | 0.5  |
| SU01-08          | 471                        | 325      | 0.69 | 0.0023                              | 0.0001 | 0.0461                               | 0.0011 | 0.0147                              | 0.0007 | 14.9                                | 0.5  | 1.0                                  | 47   | 14.8                                | 0.7  | 14.9                                | 0.5  |
| SU01-09          | 119                        | 65       | 0.54 | 0.0026                              | 0.0001 | 0.0461                               | 0.0031 | 0.0166                              | 0.0014 | 16.8                                | 0.5  | 3.0                                  | 145  | 17.0                                | 1.0  | 16.8                                | 0.5  |
| SU01-10          | 120                        | 69       | 0.58 | 0.0028                              | 0.0001 | 0.0461                               | 0.0021 | 0.0177                              | 0.0011 | 17.9                                | 0.4  | 4.0                                  | 94   | 18.0                                | 1.0  | 17.9                                | 0.4  |
| SU01-12          | 220                        | 70       | 0.32 | 0.0027                              | 0.0001 | 0.0462                               | 0.0020 | 0.0172                              | 0.0010 | 17.4                                | 0.4  | 6.0                                  | 91   | 17.0                                | 1.0  | 17.4                                | 0.4  |
| SU01-13R         | 141                        | 74       | 0.52 | 0.0026                              | 0.0001 | 0.0523                               | 0.0063 | 0.0186                              | 0.0027 | 16.6                                | 0.6  | 299                                  | 259  | 19.0                                | 3.0  | 16.6                                | 0.6  |
| SU01-15          | 244                        | 292      | 1.20 | 0.0028                              | 0.0002 | 0.0508                               | 0.0069 | 0.0197                              | 0.0036 | 18.1                                | 1.0  | 230                                  | 290  | 20.0                                | 4.0  | 18.1                                | 1.0  |
| SU01-17          | 107                        | 65       | 0.61 | 0.0026                              | 0.0001 | 0.0461                               | 0.0085 | 0.0162                              | 0.0034 | 16.4                                | 0.7  | 4.0                                  | 309  | 16.0                                | 3.0  | 16.4                                | 0.7  |
| SU01-19          | 360                        | 398      | 1.11 | 0.0024                              | 0.0001 | 0.0461                               | 0.0022 | 0.0152                              | 0.0009 | 15.3                                | 0.4  | 3.0                                  | 98   | 15.3                                | 0.9  | 15.3                                | 0.4  |
| SU01-20          | 80                         | 35       | 0.44 | 0.0027                              | 0.0001 | 0.0469                               | 0.0091 | 0.0171                              | 0.0041 | 17.1                                | 0.8  | 44                                   | 346  | 17.0                                | 4.0  | 17.1                                | 0.8  |
| SU01-23          | 117                        | 62       | 0.53 | 0.0023                              | 0.0002 | 0.0461                               | 0.0075 | 0.0147                              | 0.0030 | 15.0                                | 1.0  | 1.0                                  | 278  | 15.0                                | 3.0  | 15.0                                | 1.0  |
| SU01-24          | 133                        | 72       | 0.54 | 0.0025                              | 0.0001 | 0.0488                               | 0.0098 | 0.0165                              | 0.0039 | 15.8                                | 0.8  | 139.0                                | 353  | 17.0                                | 4.0  | 15.8                                | 0.8  |

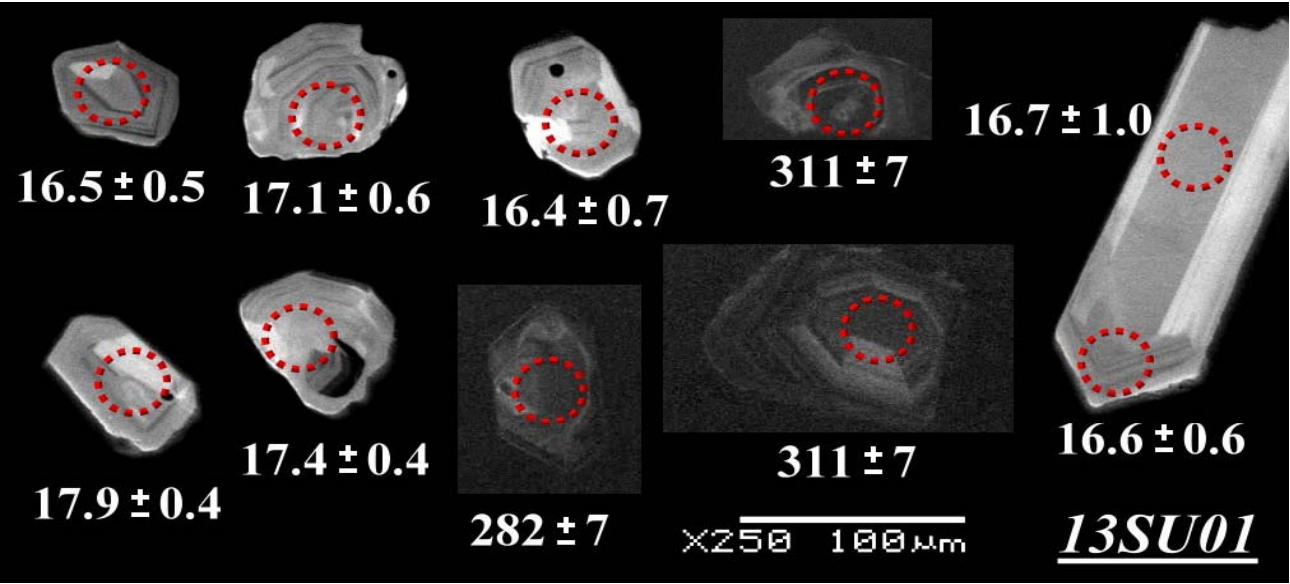

| Spot.            | U (ppm)                    | Th (ppm) | Th/U | U-Th-Pb ratios                      |        |                                      |        |                                     |        | Age (Ma)                            |      |                                      |      |                                     |      | Age (Ma)                            |      |
|------------------|----------------------------|----------|------|-------------------------------------|--------|--------------------------------------|--------|-------------------------------------|--------|-------------------------------------|------|--------------------------------------|------|-------------------------------------|------|-------------------------------------|------|
|                  |                            |          |      | <sup>206</sup> Pb/ <sup>238</sup> U | ± 1σ   | <sup>207</sup> Pb/ <sup>206</sup> Pb | ± 1σ   | <sup>207</sup> Pb/ <sup>235</sup> U | ± 1σ   | <sup>206</sup> Pb/ <sup>238</sup> U | ± 1σ | <sup>207</sup> Pb/ <sup>206</sup> Pb | ± 1σ | <sup>207</sup> Pb/ <sup>235</sup> U | ± 1σ | <sup>206</sup> Pb/ <sup>238</sup> U | ± 1σ |
| Tertiary Volcano |                            |          |      |                                     |        |                                      |        |                                     |        |                                     |      |                                      |      |                                     |      |                                     |      |
| 13SU04           | wt. mean = 20.1 ± 0.3 (2σ) |          |      |                                     |        |                                      |        |                                     |        |                                     |      |                                      |      |                                     |      |                                     |      |
| SU04-01          | 687                        | 1174     | 1.71 | 0.0032                              | 0.0001 | 0.0462                               | 0.0065 | 0.0203                              | 0.0034 | 20.5                                | 0.7  | 7.0                                  | 242  | 20.0                                | 3.0  | 20.5                                | 0.7  |
| SU04-02          | 1593                       | 5806     | 3.64 | 0.0031                              | 0.0001 | 0.0486                               | 0.0009 | 0.0209                              | 0.0008 | 20.0                                | 0.4  | 129                                  | 42   | 21.0                                | 0.8  | 20.0                                | 0.4  |
| SU04-04          | 1742                       | 5892     | 3.38 | 0.0032                              | 0.0001 | 0.0492                               | 0.0008 | 0.0216                              | 0.0007 | 20.5                                | 0.5  | 156                                  | 33   | 21.6                                | 0.7  | 20.5                                | 0.5  |
| SU04-05          | 1052                       | 5091     | 4.84 | 0.0031                              | 0.0001 | 0.0461                               | 0.0015 | 0.0197                              | 0.0010 | 19.9                                | 0.5  | 4.0                                  | 58   | 19.8                                | 1.0  | 19.9                                | 0.5  |
| SU04-06          | 938                        | 3499     | 3.73 | 0.0031                              | 0.0001 | 0.0461                               | 0.0028 | 0.0196                              | 0.0015 | 19.9                                | 0.5  | 3.0                                  | 111  | 20.0                                | 2.0  | 19.9                                | 0.5  |
| SU04-07          | 1500                       | 5279     | 3.52 | 0.0031                              | 0.0001 | 0.0461                               | 0.0026 | 0.0200                              | 0.0015 | 20.2                                | 0.5  | 3.0                                  | 105  | 20.0                                | 1.0  | 20.2                                | 0.5  |
| SU04-08          | 1568                       | 4134     | 2.64 | 0.0032                              | 0.0001 | 0.0461                               | 0.0002 | 0.0200                              | 0.0005 | 20.3                                | 0.5  | 3.0                                  | 10.0 | 20.1                                | 0.5  | 20.3                                | 0.5  |
| SU04-09          | 1572                       | 3546     | 2.26 | 0.0032                              | 0.0001 | 0.0507                               | 0.0010 | 0.0222                              | 0.0009 | 20.4                                | 0.5  | 228                                  | 41   | 22.3                                | 0.8  | 20.4                                | 0.5  |
| SU04-10          | 1563                       | 7068     | 4.52 | 0.0031                              | 0.0001 | 0.0530                               | 0.0010 | 0.0230                              | 0.0009 | 20.2                                | 0.5  | 331                                  | 38   | 23.1                                | 0.8  | 20.2                                | 0.5  |
| SU04-11          | 1473                       | 4964     | 3.37 | 0.0033                              | 0.0001 | 0.0461                               | 0.0003 | 0.0209                              | 0.0005 | 21.1                                | 0.5  | 2.0                                  | 12.0 | 21.0                                | 0.5  | 21.1                                | 0.5  |
| SU04-12          | 1449                       | 6852     | 4.73 | 0.0033                              | 0.0001 | 0.0461                               | 0.0027 | 0.0207                              | 0.0016 | 20.9                                | 0.5  | 5.0                                  | 107  | 21.0                                | 2.0  | 20.9                                | 0.5  |
| SU04-14          | 1418                       | 6682     | 4.71 | 0.0030                              | 0.0001 | 0.0461                               | 0.0025 | 0.0190                              | 0.0014 | 19.2                                | 0.5  | 4.0                                  | 101  | 19.0                                | 1.0  | 19.2                                | 0.5  |
| SU04-15R         | 1508                       | 5874     | 3.89 | 0.0031                              | 0.0001 | 0.0491                               | 0.0010 | 0.0213                              | 0.0009 | 20.2                                | 0.5  | 155                                  | 45   | 21.4                                | 0.9  | 20.2                                | 0.5  |
| SU04-17          | 989                        | 2324     | 2.35 | 0.0031                              | 0.0001 | 0.0462                               | 0.0036 | 0.0197                              | 0.0020 | 19.9                                | 0.6  | 6.0                                  | 147  | 20.0                                | 2.0  | 19.9                                | 0.6  |
| SU04-18          | 968                        | 1367     | 1.41 | 0.0030                              | 0.0001 | 0.0461                               | 0.0004 | 0.0187                              | 0.0006 | 19.0                                | 0.6  | 2.0                                  | 16.0 | 18.8                                | 0.6  | 19.0                                | 0.6  |
| SU04-19          | 1555                       | 7596     | 4.88 | 0.0030                              | 0.0001 | 0.0462                               | 0.0063 | 0.0189                              | 0.0030 | 19.1                                | 0.6  | 6.0                                  | 235  | 19.0                                | 3.0  | 19.1                                | 0.6  |
| SU04-20          | 925                        | 2330     | 2.52 | 0.0033                              | 0.0001 | 0.0462                               | 0.0053 | 0.0207                              | 0.0028 | 20.9                                | 0.6  | 7.0                                  | 216  | 21.0                                | 3.0  | 20.9                                | 0.6  |

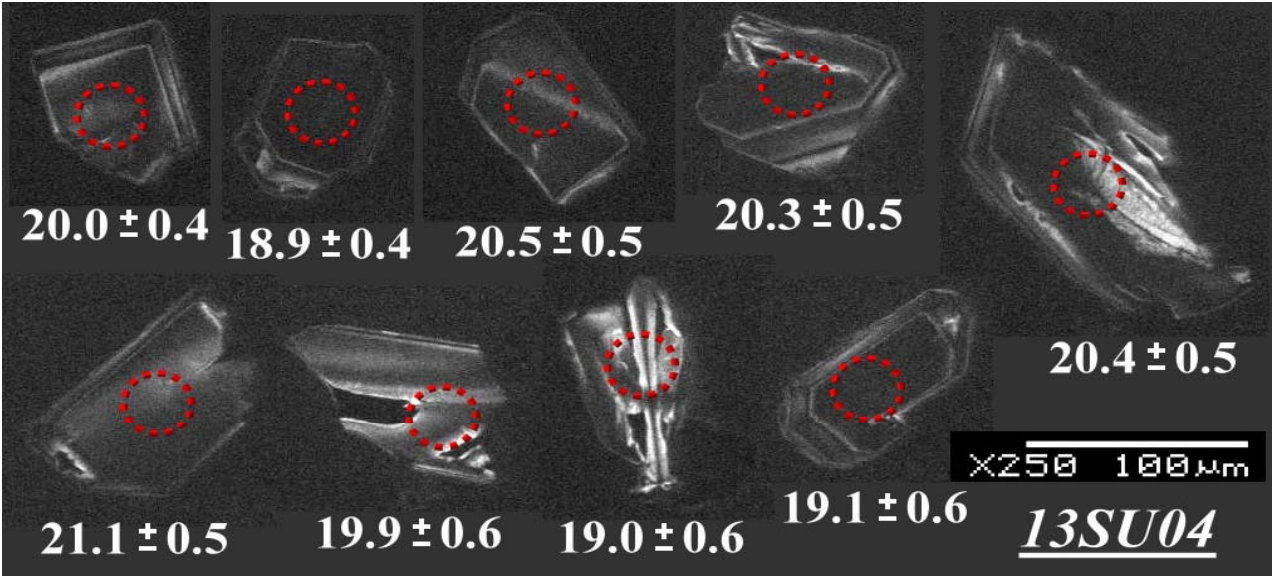

**5. Table S2**

| Sample name                                 | 13SU01                                 | 13SU03                                 | 13SU04                                 | 13SU05                                 | 13SU11                                 | 13SU24                                | 13SU27                                  |
|---------------------------------------------|----------------------------------------|----------------------------------------|----------------------------------------|----------------------------------------|----------------------------------------|---------------------------------------|-----------------------------------------|
| Volcanoes <sup>a</sup>                      | TV                                     | TV                                     | TV                                     | TV                                     | TV                                     | TV                                    | GV                                      |
| GPS                                         | N 05° 04.523'<br>E 95° 35.948'<br>32 m | N 04° 51.191'<br>E 95° 25.317'<br>25 m | N 04° 51.191'<br>E 95° 25.317'<br>25 m | N 04° 54.214'<br>E 95° 23.705'<br>15 m | N 03° 21.304'<br>E 97° 07.303'<br>18 m | N 03° 29.527'<br>E 97° 04.635'<br>5 m | N 05° 01.142'<br>E 96° 41.929'<br>366 m |
| Ages <sup>b</sup>                           | 16.5 ± 0.5                             |                                        | 20.1 ± 0.3                             |                                        |                                        |                                       |                                         |
| <sup>87</sup> Sr/ <sup>86</sup> Sr          | 0.705548±10                            |                                        | 0.704789±10                            |                                        | 0.704337±08                            | 0.704759±08                           |                                         |
| <sup>143</sup> Nd/ <sup>144</sup> Nd        | 0.512867±06                            |                                        | 0.512754±06                            |                                        | 0.512902±04                            | 0.512969±07                           |                                         |
| <i>Major oxides (wt.%)</i>                  |                                        |                                        |                                        |                                        |                                        |                                       |                                         |
| SiO <sub>2</sub>                            | 53.65                                  | 58.35                                  | 58.48                                  | 55.33                                  | 48.20                                  | 49.63                                 | 58.11                                   |
| TiO <sub>2</sub>                            | 0.74                                   | 0.47                                   | 0.45                                   | 0.69                                   | 1.69                                   | 1.68                                  | 0.69                                    |
| Al <sub>2</sub> O <sub>3</sub>              | 18.50                                  | 18.40                                  | 18.28                                  | 18.31                                  | 17.05                                  | 15.51                                 | 17.81                                   |
| Fe <sub>2</sub> O <sub>3</sub> <sup>c</sup> | 7.84                                   | 6.20                                   | 5.66                                   | 8.61                                   | 10.42                                  | 9.38                                  | 7.14                                    |
| MnO                                         | 0.14                                   | 0.24                                   | 0.21                                   | 0.19                                   | 0.21                                   | 0.16                                  | 0.16                                    |
| MgO                                         | 3.72                                   | 1.76                                   | 1.54                                   | 2.83                                   | 6.82                                   | 6.27                                  | 2.35                                    |
| CaO                                         | 7.30                                   | 5.78                                   | 4.61                                   | 6.32                                   | 8.67                                   | 11.05                                 | 6.78                                    |
| Na <sub>2</sub> O                           | 4.40                                   | 5.04                                   | 5.53                                   | 4.83                                   | 3.58                                   | 4.25                                  | 3.17                                    |
| K <sub>2</sub> O                            | 0.68                                   | 1.19                                   | 1.26                                   | 0.79                                   | 0.71                                   | 0.30                                  | 2.53                                    |
| P <sub>2</sub> O <sub>5</sub>               | 0.20                                   | 0.35                                   | 0.34                                   | 0.25                                   | 0.34                                   | 0.24                                  | 0.21                                    |
| L.O.I.                                      | 4.49                                   | 2.53                                   | 3.68                                   | 2.95                                   | 3.52                                   | 2.42                                  | 0.81                                    |
| Total                                       | 101.70                                 | 100.30                                 | 100.00                                 | 101.10                                 | 101.20                                 | 100.90                                | 99.80                                   |
| <i>Trace elements (ppm)</i>                 |                                        |                                        |                                        |                                        |                                        |                                       |                                         |
| Sc                                          | 25.7                                   | 11.5                                   | 23.8                                   | 21.2                                   | 39.1                                   | 58.0                                  | 11.5                                    |
| V                                           | 193                                    | 53.4                                   | 43.7                                   | 126                                    | 229                                    | 315                                   | 175                                     |
| Cr                                          | 35.0                                   | 23.0                                   | 47.0                                   | 12.0                                   | 118                                    | 88.0                                  | 20.0                                    |
| Co                                          | 18.8                                   | 7.10                                   | 5.90                                   | 13.3                                   | 37.0                                   | 33.4                                  | 11.7                                    |
| Ni                                          | 21.5                                   | 32.2                                   | 25.1                                   | 9.46                                   | 54.1                                   | 41.5                                  | 10.8                                    |
| Rb                                          | 12.6                                   | 33.8                                   | 33.4                                   | 21.6                                   | 36.6                                   | 13.3                                  | 110                                     |
| Sr                                          | 549                                    | 651                                    | 457                                    | 481                                    | 570                                    | 623                                   | 475                                     |
| Y                                           | 19.2                                   | 26.4                                   | 26.0                                   | 23.5                                   | 30.7                                   | 30.2                                  | 23.9                                    |
| Zr                                          | 95.0                                   | 115                                    | 119                                    | 101                                    | 187                                    | 153                                   | 148                                     |
| Nb                                          | 2.60                                   | 4.00                                   | 4.10                                   | 2.50                                   | 5.00                                   | 2.00                                  | 7.30                                    |
| Cs                                          | 0.73                                   | 1.78                                   | 1.28                                   | 0.65                                   | 3.83                                   | 5.48                                  | 4.74                                    |
| Ba                                          | 188                                    | 413                                    | 431                                    | 311                                    | 169                                    | 93.0                                  | 511                                     |
| La                                          | 9.70                                   | 21.9                                   | 22.0                                   | 13.1                                   | 13.5                                   | 8.10                                  | 31.4                                    |
| Ce                                          | 22.2                                   | 45.6                                   | 46.0                                   | 28.4                                   | 31.7                                   | 22.1                                  | 60.9                                    |
| Pr                                          | 3.06                                   | 5.82                                   | 5.86                                   | 3.75                                   | 4.33                                   | 3.34                                  | 7.06                                    |
| Nd                                          | 13.4                                   | 23.7                                   | 23.9                                   | 16.1                                   | 18.7                                   | 15.3                                  | 26.0                                    |
| Sm                                          | 3.25                                   | 5.00                                   | 5.04                                   | 3.85                                   | 4.71                                   | 4.29                                  | 5.17                                    |
| Eu                                          | 1.04                                   | 1.55                                   | 1.53                                   | 1.20                                   | 1.57                                   | 1.54                                  | 1.33                                    |
| Gd                                          | 3.33                                   | 4.57                                   | 4.56                                   | 3.86                                   | 5.16                                   | 5.01                                  | 4.57                                    |
| Tb                                          | 0.52                                   | 0.69                                   | 0.68                                   | 0.59                                   | 0.82                                   | 0.81                                  | 0.67                                    |
| Dy                                          | 3.22                                   | 4.21                                   | 4.25                                   | 3.80                                   | 5.13                                   | 5.13                                  | 4.11                                    |
| Ho                                          | 0.70                                   | 0.93                                   | 0.92                                   | 0.85                                   | 1.10                                   | 1.10                                  | 0.86                                    |
| Er                                          | 1.97                                   | 2.65                                   | 2.65                                   | 2.42                                   | 3.03                                   | 3.02                                  | 2.37                                    |
| Tm                                          | 0.30                                   | 0.42                                   | 0.42                                   | 0.38                                   | 0.46                                   | 0.44                                  | 0.36                                    |
| Yb                                          | 1.99                                   | 2.83                                   | 2.83                                   | 2.54                                   | 2.85                                   | 2.83                                  | 2.34                                    |
| Lu                                          | 0.32                                   | 0.46                                   | 0.45                                   | 0.40                                   | 0.44                                   | 0.42                                  | 0.36                                    |
| Hf                                          | 2.46                                   | 2.79                                   | 2.91                                   | 2.49                                   | 3.53                                   | 3.12                                  | 3.87                                    |
| Ta                                          | 0.16                                   | 0.22                                   | 0.24                                   | 0.15                                   | 0.39                                   | 0.17                                  | 0.52                                    |
| Th                                          | 1.55                                   | 5.06                                   | 5.20                                   | 3.11                                   | 1.37                                   | 0.49                                  | 13.9                                    |
| U                                           | 0.55                                   | 0.98                                   | 1.00                                   | 0.63                                   | 0.34                                   | 0.11                                  | 2.67                                    |

<sup>a</sup>TV, Tertiary volcanics; GV, Geureudong volcano; SV, Seulawah Agam volcano.<sup>b</sup>Age data are zircon U-Pb ages.<sup>c</sup>Total Fe measured as Fe<sub>2</sub>O<sub>3</sub>.

Table S2. (continued)

| Sample name                       | 13SU28                                 | 13SU29                                 | 13SU30-1                               | 13SU30-2                               | 13SU30-3                               | 13SU30-4                               | 13SU30-5                               |
|-----------------------------------|----------------------------------------|----------------------------------------|----------------------------------------|----------------------------------------|----------------------------------------|----------------------------------------|----------------------------------------|
| Volcano                           | GV                                     |
| GPS                               | N 05° 01.142'<br>E 96° 41.929'<br>366m |
| Ages                              | < 0.3                                  |                                        |                                        |                                        |                                        |                                        |                                        |
| $^{87}\text{Sr}/^{86}\text{Sr}$   |                                        | 0.704700±06                            | 0.704424±08                            | 0.704498±12                            |                                        |                                        |                                        |
| $^{143}\text{Nd}/^{144}\text{Nd}$ |                                        | 0.512632±06                            | 0.512662±05                            | 0.512667±05                            |                                        |                                        |                                        |
| <i>Major oxides (wt.%)</i>        |                                        |                                        |                                        |                                        |                                        |                                        |                                        |
| SiO <sub>2</sub>                  | 61.84                                  | 58.48                                  | 49.59                                  | 54.77                                  | 58.26                                  | 57.34                                  | 57.03                                  |
| TiO <sub>2</sub>                  | 0.48                                   | 0.60                                   | 0.94                                   | 0.73                                   | 0.71                                   | 0.61                                   | 0.69                                   |
| Al <sub>2</sub> O <sub>3</sub>    | 17.41                                  | 18.33                                  | 19.05                                  | 17.54                                  | 17.81                                  | 17.85                                  | 17.71                                  |
| Fe <sub>2</sub> O <sub>3</sub>    | 5.56                                   | 7.10                                   | 10.99                                  | 8.45                                   | 7.24                                   | 7.58                                   | 7.71                                   |
| MnO                               | 0.14                                   | 0.14                                   | 0.39                                   | 0.23                                   | 0.16                                   | 0.17                                   | 0.17                                   |
| MgO                               | 1.89                                   | 2.16                                   | 3.24                                   | 3.51                                   | 2.48                                   | 2.64                                   | 2.92                                   |
| CaO                               | 5.78                                   | 6.88                                   | 9.54                                   | 8.38                                   | 6.94                                   | 6.80                                   | 7.48                                   |
| Na <sub>2</sub> O                 | 3.62                                   | 3.67                                   | 3.20                                   | 3.12                                   | 3.28                                   | 3.10                                   | 3.25                                   |
| K <sub>2</sub> O                  | 2.18                                   | 2.14                                   | 1.68                                   | 2.16                                   | 2.38                                   | 2.71                                   | 2.35                                   |
| P <sub>2</sub> O <sub>5</sub>     | 0.18                                   | 0.21                                   | 0.27                                   | 0.25                                   | 0.21                                   | 0.22                                   | 0.20                                   |
| L.O.I.                            | 0.40                                   | 0.41                                   | 1.45                                   | 1.33                                   | 0.81                                   | 1.14                                   | 1.31                                   |
| Total                             | 99.50                                  | 100.10                                 | 100.30                                 | 100.50                                 | 100.30                                 | 100.20                                 | 100.80                                 |
| <i>Trace elements (ppm)</i>       |                                        |                                        |                                        |                                        |                                        |                                        |                                        |
| Sc                                | 10.1                                   | 15.7                                   | 28.2                                   | 26.5                                   | 18.4                                   | 23.3                                   | 26.0                                   |
| V                                 | 97.1                                   | 180                                    | 299                                    | 251                                    | 171                                    | 174                                    | 209                                    |
| Cr                                | 9.00                                   | 64.0                                   | 20.0                                   | 135                                    | 20.0                                   | 48.0                                   | 6.00                                   |
| Co                                | 9.80                                   | 12.2                                   | 22.7                                   | 19.3                                   | 11.5                                   | 14.8                                   | 16.9                                   |
| Ni                                | 7.32                                   | 26.5                                   | 65.0                                   | 41.4                                   | 15.4                                   | 30.0                                   | 12.4                                   |
| Rb                                | 78.1                                   | 78.8                                   | 56.9                                   | 88.5                                   | 104                                    | 108                                    | 92.0                                   |
| Sr                                | 542                                    | 616                                    | 531                                    | 508                                    | 471                                    | 489                                    | 506                                    |
| Y                                 | 17.3                                   | 18.9                                   | 23.2                                   | 24.0                                   | 23.4                                   | 21.6                                   | 20.5                                   |
| Zr                                | 105                                    | 117                                    | 99.0                                   | 121                                    | 146                                    | 143                                    | 127                                    |
| Nb                                | 4.90                                   | 4.80                                   | 4.30                                   | 4.80                                   | 7.20                                   | 5.20                                   | 4.90                                   |
| Cs                                | 1.98                                   | 2.49                                   | 0.92                                   | 1.79                                   | 3.90                                   | 5.49                                   | 4.31                                   |
| Ba                                | 632                                    | 614                                    | 386                                    | 503                                    | 527                                    | 616                                    | 551                                    |
| La                                | 24.2                                   | 25.0                                   | 22.6                                   | 26.1                                   | 29.6                                   | 29.0                                   | 24.8                                   |
| Ce                                | 44.1                                   | 47.3                                   | 44.1                                   | 48.3                                   | 56.9                                   | 50.4                                   | 46.9                                   |
| Pr                                | 5.08                                   | 5.52                                   | 5.38                                   | 5.76                                   | 6.69                                   | 6.05                                   | 5.45                                   |
| Nd                                | 18.4                                   | 20.6                                   | 20.9                                   | 21.6                                   | 24.7                                   | 22.1                                   | 20.3                                   |
| Sm                                | 3.60                                   | 4.10                                   | 4.60                                   | 4.43                                   | 4.92                                   | 4.34                                   | 4.14                                   |
| Eu                                | 1.03                                   | 1.19                                   | 1.33                                   | 1.26                                   | 1.27                                   | 1.20                                   | 1.16                                   |
| Gd                                | 3.15                                   | 3.59                                   | 4.31                                   | 4.17                                   | 4.38                                   | 3.83                                   | 3.72                                   |
| Tb                                | 0.45                                   | 0.52                                   | 0.62                                   | 0.61                                   | 0.63                                   | 0.57                                   | 0.54                                   |
| Dy                                | 2.82                                   | 3.18                                   | 3.86                                   | 3.77                                   | 3.90                                   | 3.47                                   | 3.43                                   |
| Ho                                | 0.61                                   | 0.67                                   | 0.83                                   | 0.81                                   | 0.81                                   | 0.75                                   | 0.71                                   |
| Er                                | 1.73                                   | 1.85                                   | 2.22                                   | 2.28                                   | 2.28                                   | 2.05                                   | 2.00                                   |
| Tm                                | 0.26                                   | 0.28                                   | 0.33                                   | 0.34                                   | 0.34                                   | 0.31                                   | 0.30                                   |
| Yb                                | 1.85                                   | 1.87                                   | 2.07                                   | 2.27                                   | 2.28                                   | 2.12                                   | 2.01                                   |
| Lu                                | 0.29                                   | 0.29                                   | 0.31                                   | 0.34                                   | 0.35                                   | 0.33                                   | 0.31                                   |
| Hf                                | 2.78                                   | 2.99                                   | 2.62                                   | 3.16                                   | 3.77                                   | 3.60                                   | 3.22                                   |
| Ta                                | 0.35                                   | 0.31                                   | 0.28                                   | 0.34                                   | 0.51                                   | 0.40                                   | 0.41                                   |
| Th                                | 9.97                                   | 9.14                                   | 9.70                                   | 12.6                                   | 14.0                                   | 16.1                                   | 11.8                                   |
| U                                 | 1.90                                   | 1.77                                   | 1.85                                   | 2.52                                   | 2.69                                   | 3.04                                   | 2.33                                   |

Table S2. (continued)

| Sample name                          | 13SU30-6      | 13SU32        | 13SU33-1      | 13SU33-2      | 13SU33-3      | 13SU33-4      | 13SU35        |
|--------------------------------------|---------------|---------------|---------------|---------------|---------------|---------------|---------------|
| Volcano                              | GV            | GV            | GV            | GV            | GV            | GV            | SV            |
| GPS                                  | N 05° 01.142' | N 04° 43.376' | N 05° 27.001' |
|                                      | E 96° 41.929' | E 96° 50.306' | E 95° 41.189' |
|                                      | 366m          | 1432m         | 1432m         | 1432m         | 1432m         | 1432m         | 777m          |
| Ages                                 |               |               |               |               |               |               |               |
| <sup>87</sup> Sr/ <sup>86</sup> Sr   |               | 0.705049±10   |               |               |               |               | 0.705349±10   |
| <sup>143</sup> Nd/ <sup>144</sup> Nd |               | 0.512630±05   |               |               |               |               | 0.512762±06   |
| Major oxides (wt.%)                  |               |               |               |               |               |               |               |
| SiO <sub>2</sub>                     | 59.05         | 61.24         | 61.66         | 61.16         | 61.27         | 61.38         | 48.38         |
| TiO <sub>2</sub>                     | 0.59          | 0.48          | 0.50          | 0.48          | 0.51          | 0.49          | 1.13          |
| Al <sub>2</sub> O <sub>3</sub>       | 17.33         | 17.73         | 17.50         | 17.64         | 17.63         | 17.55         | 21.26         |
| Fe <sub>2</sub> O <sub>3</sub>       | 6.73          | 5.72          | 5.75          | 5.68          | 5.90          | 5.69          | 7.19          |
| MnO                                  | 0.14          | 0.14          | 0.14          | 0.14          | 0.15          | 0.14          | 0.11          |
| MgO                                  | 2.26          | 2.03          | 2.07          | 2.00          | 2.11          | 2.04          | 4.54          |
| CaO                                  | 6.46          | 6.21          | 5.95          | 6.23          | 6.18          | 6.12          | 11.62         |
| Na <sub>2</sub> O                    | 2.96          | 3.54          | 3.56          | 3.54          | 3.48          | 3.59          | 3.27          |
| K <sub>2</sub> O                     | 2.84          | 2.12          | 2.19          | 2.11          | 2.13          | 2.16          | 0.83          |
| P <sub>2</sub> O <sub>5</sub>        | 0.18          | 0.19          | 0.19          | 0.19          | 0.19          | 0.19          | 0.27          |
| L.O.I.                               | 1.38          | 0.53          | 0.63          | 0.80          | 0.81          | 0.86          | 1.98          |
| Total                                | 99.90         | 99.90         | 100.10        | 100.00        | 100.40        | 100.20        | 100.60        |
| Trace elements (ppm)                 |               |               |               |               |               |               |               |
| Sc                                   | 10.9          | 13.5          | 14.2          | 10.2          | 16.9          | 9.20          | 30.4          |
| V                                    | 156           | 123           | 121           | 124           | 126           | 127           | 179           |
| Cr                                   | 11.0          | 19.0          | 11.0          | 13.0          | 13.0          | 26.0          | 281           |
| Co                                   | 12.6          | 10.4          | 10.0          | 9.80          | 10.2          | 9.80          | 25.5          |
| Ni                                   | 7.83          | 12.3          | 8.43          | 13.6          | 9.39          | 10.9          | 91.7          |
| Rb                                   | 103           | 82.5          | 85.1          | 82.2          | 83.2          | 83.8          | 32.2          |
| Sr                                   | 481           | 574           | 549           | 571           | 564           | 569           | 740           |
| Y                                    | 18.6          | 16.8          | 17.5          | 17.0          | 17.2          | 17.3          | 20.5          |
| Zr                                   | 133           | 104           | 104           | 102           | 107           | 107           | 118           |
| Nb                                   | 5.10          | 4.60          | 4.70          | 4.50          | 4.70          | 4.60          | 5.80          |
| Cs                                   | 4.60          | 3.81          | 3.95          | 3.84          | 3.75          | 3.83          | 4.02          |
| Ba                                   | 595           | 622           | 634           | 621           | 630           | 628           | 199           |
| La                                   | 25.7          | 22.8          | 23.5          | 22.8          | 22.9          | 22.9          | 14.3          |
| Ce                                   | 47.5          | 41.9          | 43.5          | 42.1          | 42.5          | 42.4          | 31.1          |
| Pr                                   | 5.34          | 4.80          | 4.97          | 4.86          | 4.85          | 4.83          | 4.17          |
| Nd                                   | 19.4          | 17.6          | 18.1          | 17.7          | 17.6          | 17.8          | 17.1          |
| Sm                                   | 3.79          | 3.44          | 3.47          | 3.44          | 3.51          | 3.46          | 3.76          |
| Eu                                   | 1.10          | 1.01          | 0.99          | 1.03          | 1.04          | 1.03          | 1.30          |
| Gd                                   | 3.33          | 3.04          | 3.06          | 2.96          | 3.04          | 3.00          | 3.75          |
| Tb                                   | 0.48          | 0.43          | 0.44          | 0.44          | 0.44          | 0.44          | 0.56          |
| Dy                                   | 2.94          | 2.73          | 2.76          | 2.79          | 2.75          | 2.72          | 3.55          |
| Ho                                   | 0.65          | 0.58          | 0.59          | 0.58          | 0.59          | 0.58          | 0.73          |
| Er                                   | 1.78          | 1.63          | 1.68          | 1.66          | 1.69          | 1.66          | 2.01          |
| Tm                                   | 0.28          | 0.26          | 0.26          | 0.25          | 0.25          | 0.27          | 0.29          |
| Yb                                   | 1.86          | 1.73          | 1.79          | 1.77          | 1.81          | 1.79          | 1.86          |
| Lu                                   | 0.29          | 0.28          | 0.28          | 0.28          | 0.28          | 0.28          | 0.27          |
| Hf                                   | 3.30          | 2.72          | 2.73          | 2.65          | 2.79          | 2.81          | 2.41          |
| Ta                                   | 0.54          | 0.34          | 0.33          | 0.35          | 0.32          | 0.33          | 0.38          |
| Th                                   | 13.0          | 9.53          | 9.98          | 9.54          | 9.49          | 9.63          | 3.33          |
| U                                    | 2.52          | 1.87          | 1.95          | 1.84          | 1.83          | 1.90          | 0.54          |

Table S2. (continued)

| Sample name                          | 13SU37        | 13SU38        | 13SU39        | 13SU40        | 13SU43        | 13SU44        |
|--------------------------------------|---------------|---------------|---------------|---------------|---------------|---------------|
| Volcano                              | SV            | SV            | SV            | SV            | SV            | SV            |
| GPS                                  | N 05° 26.971' | N 05° 26.971' | N 05° 26.971' | N 05° 33.069' | N 05° 32.336' | N 05° 31.640' |
|                                      | E 95° 41.901' | E 95° 41.901' | E 95° 41.901' | E 95° 30.951' | E 95° 29.586' | E 95° 29.376' |
|                                      | 772m          | 772m          | 772m          | 525m          | 350m          | 245m          |
| Ages                                 | < 0.3         |               | < 0.3         |               |               |               |
| <sup>87</sup> Sr/ <sup>86</sup> Sr   | 0.705101±12   |               | 0.704752±12   |               | 0.704579±08   |               |
| <sup>143</sup> Nd/ <sup>144</sup> Nd | 0.512743±05   |               | 0.512782±05   |               | 0.512771±05   |               |
| <i>Major oxides (wt.%)</i>           |               |               |               |               |               |               |
| SiO <sub>2</sub>                     | 59.16         | 58.14         | 61.15         | 62.36         | 56.54         | 56.12         |
| TiO <sub>2</sub>                     | 0.71          | 0.71          | 0.60          | 0.57          | 0.76          | 0.79          |
| Al <sub>2</sub> O <sub>3</sub>       | 17.81         | 17.52         | 17.22         | 17.79         | 18.00         | 18.11         |
| Fe <sub>2</sub> O <sub>3</sub>       | 7.13          | 7.17          | 6.25          | 4.96          | 7.98          | 8.32          |
| MnO                                  | 0.14          | 0.14          | 0.14          | 0.13          | 0.16          | 0.15          |
| MgO                                  | 2.89          | 3.30          | 2.63          | 2.09          | 3.08          | 3.42          |
| CaO                                  | 6.07          | 6.63          | 5.91          | 5.53          | 7.79          | 7.98          |
| Na <sub>2</sub> O                    | 3.41          | 3.35          | 3.77          | 3.68          | 3.32          | 3.31          |
| K <sub>2</sub> O                     | 1.57          | 1.51          | 1.71          | 1.55          | 1.41          | 1.26          |
| P <sub>2</sub> O <sub>5</sub>        | 0.14          | 0.13          | 0.14          | 0.15          | 0.18          | 0.18          |
| L.O.I.                               | 1.21          | 1.55          | 1.03          | 1.17          | 0.89          | 1.08          |
| Total                                | 100.20        | 100.10        | 100.60        | 100.00        | 100.10        | 100.70        |
| <i>Trace elements (ppm)</i>          |               |               |               |               |               |               |
| Sc                                   | 27.7          | 34.5          | 24.9          | 12.9          | 21.1          | 33.2          |
| V                                    | 194           | 225           | 150           | 135           | 239           | 252           |
| Cr                                   | 15.0          | 14.0          | 27.0          | 13.0          | 44.0          | 48.0          |
| Co                                   | 17.0          | 17.9          | 13.9          | 11.5          | 20.4          | 20.5          |
| Ni                                   | 9.15          | 8.94          | 12.2          | 11.7          | 28.0          | 35.8          |
| Rb                                   | 43.9          | 42.6          | 58.0          | 50.7          | 44.3          | 41.4          |
| Sr                                   | 343           | 326           | 320           | 358           | 407           | 413           |
| Y                                    | 19.6          | 18.6          | 18.6          | 17.0          | 30.0          | 31.1          |
| Zr                                   | 133           | 126           | 143           | 128           | 110           | 105           |
| Nb                                   | 3.30          | 3.20          | 3.60          | 3.70          | 3.10          | 3.10          |
| Cs                                   | 1.34          | 1.69          | 2.33          | 1.43          | 1.97          | 2.25          |
| Ba                                   | 372           | 349           | 390           | 426           | 328           | 303           |
| La                                   | 14.5          | 13.0          | 14.4          | 14.6          | 17.6          | 16.6          |
| Ce                                   | 26.9          | 26.1          | 28.6          | 28.8          | 29.1          | 31.0          |
| Pr                                   | 3.51          | 3.26          | 3.49          | 3.43          | 4.24          | 4.21          |
| Nd                                   | 13.6          | 12.7          | 13.6          | 13.1          | 17.2          | 17.5          |
| Sm                                   | 3.02          | 2.86          | 2.96          | 2.86          | 3.90          | 4.11          |
| Eu                                   | 0.94          | 0.91          | 0.92          | 0.98          | 1.24          | 1.29          |
| Gd                                   | 3.10          | 2.98          | 2.88          | 2.75          | 4.32          | 4.47          |
| Tb                                   | 0.47          | 0.45          | 0.44          | 0.42          | 0.65          | 0.67          |
| Dy                                   | 3.07          | 2.97          | 2.88          | 2.75          | 4.25          | 4.41          |
| Ho                                   | 0.67          | 0.66          | 0.64          | 0.60          | 0.96          | 0.99          |
| Er                                   | 1.96          | 1.86          | 1.86          | 1.72          | 2.73          | 2.78          |
| Tm                                   | 0.30          | 0.29          | 0.29          | 0.27          | 0.42          | 0.43          |
| Yb                                   | 2.08          | 1.99          | 2.06          | 1.89          | 2.81          | 2.87          |
| Lu                                   | 0.33          | 0.31          | 0.32          | 0.29          | 0.44          | 0.44          |
| Hf                                   | 3.24          | 3.08          | 3.41          | 3.14          | 2.82          | 2.67          |
| Ta                                   | 0.26          | 0.28          | 0.27          | 0.27          | 0.21          | 0.20          |
| Th                                   | 4.45          | 4.37          | 4.71          | 7.04          | 5.34          | 4.99          |
| U                                    | 1.01          | 1.09          | 1.14          | 1.44          | 1.16          | 1.11          |

6. Table S3

| Spot.                     | U (ppm) | Th (ppm) | Th/U | U-Th-Pb ratios                      |        |                                      |        |                                     |        | Age (Ma)                            |      |                                      |      |                                     |      | Inferred Age (Ma) | ± 1σ |
|---------------------------|---------|----------|------|-------------------------------------|--------|--------------------------------------|--------|-------------------------------------|--------|-------------------------------------|------|--------------------------------------|------|-------------------------------------|------|-------------------|------|
|                           |         |          |      | <sup>206</sup> Pb/ <sup>238</sup> U | ± 1σ   | <sup>207</sup> Pb/ <sup>206</sup> Pb | ± 1σ   | <sup>207</sup> Pb/ <sup>235</sup> U | ± 1σ   | <sup>206</sup> Pb/ <sup>238</sup> U | ± 1σ | <sup>207</sup> Pb/ <sup>206</sup> Pb | ± 1σ | <sup>207</sup> Pb/ <sup>235</sup> U | ± 1σ |                   |      |
| All data from (Hsu, 2016) |         |          |      |                                     |        |                                      |        |                                     |        |                                     |      |                                      |      |                                     |      |                   |      |
| 13SU26                    |         |          |      |                                     |        |                                      |        |                                     |        |                                     |      |                                      |      |                                     |      |                   |      |
| SU26-001                  | 400     | 302      | 0.75 | 0.0009                              | 0.0000 | 0.0705                               | 0.0043 | 0.0087                              | 0.0008 | 5.8                                 | 0.2  | 942                                  | 111  | 8.8                                 | 0.8  | 5.8               | 0.2  |
| SU26-002                  | 286     | 294      | 1.03 | 0.0013                              | 0.0001 | 0.0632                               | 0.0041 | 0.0114                              | 0.0011 | 8.4                                 | 0.3  | 713                                  | 125  | 12                                  | 1    | 8.4               | 0.3  |
| SU26-003                  | 119     | 127      | 1.07 | 0.0021                              | 0.0001 | 0.0606                               | 0.0072 | 0.0179                              | 0.0028 | 13.8                                | 0.6  | 625                                  | 235  | 18                                  | 3    | 13.8              | 0.6  |
| SU26-004                  | 204     | 170      | 0.83 | 0.0016                              | 0.0001 | 0.0462                               | 0.0050 | 0.0100                              | 0.0014 | 10.1                                | 0.4  | 7                                    | 193  | 10                                  | 1    | 10.1              | 0.4  |
| SU26-005                  | 104     | 95       | 0.91 | 0.1901                              | 0.0046 | 0.0772                               | 0.0009 | 2.0221                              | 0.0531 | 1122                                | 25   | 1126                                 | 20   | 1123                                | 18   | 1126              | 20   |
| SU26-006                  | 56      | 53       | 0.95 | 0.0074                              | 0.0003 | 0.0347                               | 0.0056 | 0.0355                              | 0.0068 | 48                                  | 2    | -84                                  | 199  | 35                                  | 7    | 48                | 2    |
| SU26-007                  | 76      | 80       | 1.05 | 0.1916                              | 0.0046 | 0.0765                               | 0.0009 | 2.0202                              | 0.0540 | 1130                                | 25   | 1108                                 | 21   | 1122                                | 18   | 1108              | 21   |
| SU26-008                  | 73      | 68       | 0.93 | 0.0101                              | 0.0003 | 0.0399                               | 0.0024 | 0.0555                              | 0.0048 | 65                                  | 2    | -298                                 | 125  | 55                                  | 5    | 65                | 2    |
| SU26-009                  | 181     | 185      | 1.02 | 0.0016                              | 0.0001 | 0.0416                               | 0.0068 | 0.0093                              | 0.0018 | 10.5                                | 0.4  | -201                                 | 235  | 9                                   | 2    | 10.5              | 0.4  |
| SU26-010                  | 520     | 1759     | 3.38 | 0.0065                              | 0.0002 | 0.0465                               | 0.0009 | 0.0418                              | 0.0016 | 42                                  | 1    | 22                                   | 38   | 42                                  | 2    | 42                | 1    |
| SU26-011                  | 248     | 228      | 0.92 | 0.0035                              | 0.0001 | 0.0461                               | 0.0030 | 0.0224                              | 0.0019 | 22.6                                | 0.6  | 4                                    | 121  | 22                                  | 2    | 22.6              | 0.6  |
| SU26-012                  | 130     | 130      | 1.00 | 0.0025                              | 0.0001 | 0.0542                               | 0.0045 | 0.0188                              | 0.0022 | 16.2                                | 0.6  | 381                                  | 169  | 19                                  | 2    | 16.2              | 0.6  |
| SU26-013                  | 127     | 118      | 0.93 | 0.0009                              | 0.0001 | 0.1071                               | 0.0099 | 0.0139                              | 0.0020 | 6.1                                 | 0.4  | 1750                                 | 153  | 14                                  | 2    | 6.1               | 0.4  |
| SU26-014                  | 69      | 139      | 2.02 | 0.0829                              | 0.0020 | 0.0624                               | 0.0009 | 0.7136                              | 0.0220 | 513                                 | 12   | 689                                  | 26   | 547                                 | 13   | 513               | 12   |
| SU26-015                  | 337     | 314      | 0.93 | 0.0248                              | 0.0006 | 0.0496                               | 0.0007 | 0.1698                              | 0.0051 | 158                                 | 4    | 175                                  | 28   | 159                                 | 4    | 158               | 4    |
| SU26-016                  | 78      | 69       | 0.89 | 0.0325                              | 0.0008 | 0.0510                               | 0.0011 | 0.2287                              | 0.0094 | 206                                 | 5    | 242                                  | 44   | 209                                 | 8    | 206               | 5    |
| SU26-017                  | 163     | 111      | 0.68 | 0.0012                              | 0.0001 | 0.0581                               | 0.0084 | 0.0099                              | 0.0018 | 8                                   | 0.3  | 532                                  | 281  | 10                                  | 2    | 8                 | 0.3  |
| SU26-018                  | 206     | 322      | 1.56 | 0.0016                              | 0.0001 | 0.2137                               | 0.0353 | 0.0460                              | 0.0107 | 10                                  | 0.8  | 2934                                 | 261  | 46                                  | 10   | 10                | 0.8  |
| SU26-019                  | 137     | 81       | 0.59 | 0.0012                              | 0.0001 | 0.0288                               | 0.0107 | 0.0048                              | 0.0020 | 7.7                                 | 0.4  | -337                                 | 365  | 5                                   | 2    | 7.7               | 0.4  |
| SU26-020                  | 269     | 292      | 1.08 | 0.0010                              | 0.0000 | 0.0461                               | 0.0035 | 0.0065                              | 0.0006 | 6.6                                 | 0.2  | 4                                    | 132  | 6.6                                 | 0.6  | 6.6               | 0.2  |
| SU26-021                  | 199     | 123      | 0.62 | 0.0018                              | 0.0001 | 0.0346                               | 0.0056 | 0.0085                              | 0.0016 | 11.4                                | 0.4  | -89                                  | 200  | 9                                   | 2    | 11.4              | 0.4  |
| SU26-022                  | 286     | 327      | 1.14 | 0.0012                              | 0.0000 | 0.0727                               | 0.0048 | 0.0116                              | 0.0011 | 7.5                                 | 0.3  | 1005                                 | 120  | 12                                  | 1    | 7.5               | 0.3  |
| SU26-023                  | 297     | 520      | 1.75 | 0.0076                              | 0.0002 | 0.0443                               | 0.0011 | 0.0463                              | 0.0022 | 49                                  | 1    | -54                                  | 45   | 46                                  | 2    | 49                | 1    |
| SU26-024                  | 68      | 45       | 0.66 | 0.0016                              | 0.0001 | 0.0246                               | 0.0176 | 0.0054                              | 0.0042 | 10.3                                | 0.6  | -533                                 | 680  | 5                                   | 4    | 10.3              | 0.6  |
| SU26-025                  | 350     | 362      | 1.03 | 0.0011                              | 0.0000 | 0.0320                               | 0.0040 | 0.0048                              | 0.0008 | 7.1                                 | 0.3  | -198                                 | 145  | 4.9                                 | 0.8  | 7.1               | 0.3  |
| SU26-026                  | 125     | 89       | 0.71 | 0.0010                              | 0.0001 | 0.0501                               | 0.0149 | 0.0067                              | 0.0023 | 6.3                                 | 0.3  | 198                                  | 444  | 7                                   | 2    | 6.3               | 0.3  |
| SU26-027                  | 205     | 193      | 0.94 | 0.0009                              | 0.0000 | 0.0461                               | 0.0017 | 0.0060                              | 0.0003 | 6.1                                 | 0.2  | 2                                    | 63   | 6.1                                 | 0.3  | 6.1               | 0.2  |
| SU26-028                  | 111     | 108      | 0.98 | 0.0075                              | 0.0002 | 0.0684                               | 0.0021 | 0.0705                              | 0.0039 | 48                                  | 1    | 880                                  | 58   | 69                                  | 4    | 48                | 1    |
| SU26-029                  | 128     | 147      | 1.16 | 0.0010                              | 0.0001 | 0.0320                               | 0.0147 | 0.0042                              | 0.0022 | 6.2                                 | 0.4  | -199                                 | 512  | 4                                   | 2    | 6.2               | 0.4  |
| SU26-030                  | 297     | 195      | 0.65 | 0.0249                              | 0.0006 | 0.0459                               | 0.0007 | 0.1574                              | 0.0051 | 158                                 | 4    | -7                                   | 26   | 148                                 | 4    | 158               | 4    |
| SU26-031                  | 140     | 174      | 1.24 | 0.1604                              | 0.0038 | 0.0795                               | 0.0009 | 1.7572                              | 0.0450 | 959                                 | 21   | 1184                                 | 20   | 1030                                | 17   | 959               | 21   |
| SU26-032                  | 752     | 598      | 0.79 | 0.0333                              | 0.0008 | 0.0580                               | 0.0007 | 0.2667                              | 0.0069 | 211                                 | 5    | 531                                  | 22   | 240                                 | 6    | 211               | 5    |



|          |     |      |      |        |        |         |         |         |        |      |     |       |      |      |     |      |     |
|----------|-----|------|------|--------|--------|---------|---------|---------|--------|------|-----|-------|------|------|-----|------|-----|
| SU26-033 | 184 | 169  | 0.92 | 0.0060 | 0.0002 | 0.0556  | 0.0018  | 0.0461  | 0.0025 | 39   | 1   | 438   | 64   | 46   | 2   | 39   | 1   |
| SU26-034 | 128 | 147  | 1.15 | 0.0019 | 0.0001 | 0.0701  | 0.0059  | 0.0188  | 0.0023 | 12.5 | 0.5 | 931   | 157  | 19   | 2   | 12.5 | 0.5 |
| SU26-035 | 84  | 54   | 0.65 | 0.0014 | 0.0001 | 0.0942  | 0.0193  | 0.0177  | 0.0045 | 8.8  | 0.5 | 1512  | 400  | 18   | 4   | 8.8  | 0.5 |
| SU26-036 | 89  | 128  | 1.43 | 0.0024 | 0.0001 | 0.0585  | 0.0104  | 0.0197  | 0.0042 | 15.7 | 0.7 | 550   | 359  | 20   | 4   | 15.7 | 0.7 |
| SU26-037 | 179 | 262  | 1.46 | 0.0971 | 0.0023 | 0.0603  | 0.0007  | 0.8073  | 0.0215 | 597  | 14  | 616   | 24   | 601  | 12  | 597  | 14  |
| SU26-038 | 136 | 89   | 0.66 | 0.0015 | 0.0001 | 0.0302  | 0.0090  | 0.0064  | 0.0021 | 9.9  | 0.4 | -275  | 331  | 6    | 2   | 9.9  | 0.4 |
| SU26-039 | 211 | 442  | 2.10 | 0.0091 | 0.0002 | 0.0364  | 0.0012  | 0.0457  | 0.0025 | 58   | 2   | -17   | 242  | 45   | 2   | 58   | 2   |
| SU26-040 | 114 | 73   | 0.64 | 0.0016 | 0.0001 | 0.0809  | 0.0091  | 0.0178  | 0.0027 | 10.2 | 0.5 | 1219  | 216  | 18   | 3   | 10.2 | 0.5 |
| SU26-041 | 92  | 73   | 0.80 | 0.0011 | 0.0001 | 0.1489  | 0.0106  | 0.0234  | 0.0028 | 7.3  | 0.5 | 2334  | 116  | 24   | 3   | 7.3  | 0.5 |
| SU26-042 | 69  | 61   | 0.88 | 0.0019 | 0.0001 | 0.0593  | 0.0129  | 0.0153  | 0.0040 | 12   | 0.6 | 577   | 427  | 15   | 4   | 12   | 0.6 |
| SU26-043 | 85  | 99   | 1.17 | 0.0012 | 0.0001 | -0.0040 | -0.0171 | -0.0007 | 0.0028 | 7.7  | 0.5 | -2328 | 1372 | -1   | 3   | 7.7  | 0.5 |
| SU26-044 | 220 | 135  | 0.61 | 0.0016 | 0.0001 | 0.0568  | 0.0040  | 0.0127  | 0.0013 | 10.4 | 0.4 | 485   | 147  | 13   | 1   | 10.4 | 0.4 |
| SU26-045 | 154 | 122  | 0.80 | 0.0161 | 0.0004 | 0.0441  | 0.0011  | 0.0976  | 0.0044 | 103  | 3   | -67   | 49   | 95   | 4   | 103  | 3   |
| SU26-046 | 233 | 234  | 1.00 | 0.1972 | 0.0048 | 0.0767  | 0.0009  | 2.0850  | 0.0526 | 1160 | 26  | 1113  | 21   | 1144 | 17  | 1113 | 21  |
| SU26-047 | 79  | 85   | 1.08 | 0.0012 | 0.0001 | 0.0756  | 0.0190  | 0.0120  | 0.0036 | 7.4  | 0.5 | 1085  | 501  | 12   | 4   | 7.4  | 0.5 |
| SU26-048 | 131 | 98   | 0.75 | 0.0014 | 0.0001 | 0.0425  | 0.0055  | 0.0084  | 0.0014 | 9.3  | 0.4 | -153  | 194  | 9    | 1   | 9.3  | 0.4 |
| SU26-049 | 92  | 104  | 1.14 | 0.0083 | 0.0004 | 0.1475  | 0.0185  | 0.1683  | 0.0271 | 53   | 2   | 2317  | 210  | 158  | 24  | 53   | 2   |
| SU26-050 | 146 | 109  | 0.75 | 0.0019 | 0.0001 | 0.1435  | 0.0347  | 0.0370  | 0.0110 | 12   | 0.8 | 2270  | 446  | 37   | 11  | 12   | 0.8 |
| SU26-051 | 126 | 83   | 0.66 | 0.0016 | 0.0001 | 0.0461  | 0.0011  | 0.0098  | 0.0004 | 10   | 0.3 | 1     | 43   | 9.9  | 0.4 | 10   | 0.3 |
| SU26-052 | 648 | 1310 | 2.02 | 0.0067 | 0.0002 | 0.0503  | 0.0008  | 0.0466  | 0.0016 | 43   | 1   | 207   | 33   | 46   | 2   | 43   | 1   |
| SU26-053 | 111 | 129  | 1.16 | 0.0065 | 0.0002 | 0.0520  | 0.0017  | 0.0469  | 0.0027 | 42   | 1   | 286   | 72   | 47   | 3   | 42   | 1   |
| SU26-054 | 232 | 133  | 0.57 | 0.4596 | 0.0112 | 0.1627  | 0.0018  | 10.3057 | 0.2576 | 2438 | 50  | 2483  | 18   | 2463 | 23  | 2483 | 18  |
| SU26-055 | 266 | 273  | 1.03 | 0.0009 | 0.0000 | 0.0344  | 0.0055  | 0.0043  | 0.0009 | 5.9  | 0.3 | -99   | 216  | 4.3  | 0.9 | 5.9  | 0.3 |
| SU26-056 | 367 | 394  | 1.07 | 0.0015 | 0.0001 | 0.0662  | 0.0026  | 0.0141  | 0.0009 | 9.9  | 0.3 | 814   | 78   | 14.2 | 0.9 | 9.9  | 0.3 |
| SU26-057 | 72  | 67   | 0.93 | 0.0013 | 0.0001 | 0.0225  | 0.0158  | 0.0039  | 0.0030 | 8.1  | 0.5 | -632  | 713  | 4    | 3   | 8.1  | 0.5 |
| SU26-058 | 340 | 384  | 1.13 | 0.0063 | 0.0002 | 0.0457  | 0.0011  | 0.0395  | 0.0017 | 40   | 1   | -18   | 41   | 39   | 2   | 40   | 1   |
| SU26-059 | 112 | 90   | 0.80 | 0.0014 | 0.0001 | 0.0504  | 0.0099  | 0.0100  | 0.0023 | 9.2  | 0.4 | 214   | 339  | 10   | 2   | 9.2  | 0.4 |
| SU26-060 | 235 | 236  | 1.00 | 0.0010 | 0.0000 | 0.0558  | 0.0049  | 0.0080  | 0.0010 | 6.7  | 0.3 | 443   | 186  | 8.1  | 1   | 6.7  | 0.3 |
| SU26-061 | 190 | 146  | 0.77 | 0.0010 | 0.0000 | 0.0486  | 0.0068  | 0.0068  | 0.0012 | 6.6  | 0.3 | 127   | 262  | 7    | 1   | 6.6  | 0.3 |
| SU26-062 | 220 | 212  | 0.96 | 0.0009 | 0.0000 | 0.0461  | 0.0021  | 0.0058  | 0.0004 | 5.9  | 0.2 | 3     | 80   | 5.8  | 0.4 | 5.9  | 0.2 |
| SU26-063 | 136 | 114  | 0.84 | 0.0010 | 0.0001 | 0.0904  | 0.0110  | 0.0125  | 0.0021 | 6.5  | 0.3 | 1435  | 226  | 13   | 2   | 6.5  | 0.3 |
| SU26-064 | 138 | 116  | 0.84 | 0.0012 | 0.0001 | 0.1814  | 0.0188  | 0.0310  | 0.0046 | 8    | 0.4 | 2666  | 166  | 31   | 4   | 8    | 0.4 |
| SU26-065 | 149 | 77   | 0.52 | 0.0016 | 0.0001 | 0.3023  | 0.0087  | 0.0673  | 0.0038 | 10.4 | 0.4 | 3482  | 41   | 66   | 4   | 10.4 | 0.4 |
| SU26-066 | 995 | 1098 | 1.10 | 0.0090 | 0.0002 | 0.0533  | 0.0007  | 0.0663  | 0.0019 | 58   | 1   | 342   | 27   | 65   | 2   | 58   | 1   |
| SU26-068 | 531 | 140  | 0.26 | 0.1546 | 0.0038 | 0.0739  | 0.0008  | 1.5750  | 0.0400 | 927  | 21  | 1038  | 21   | 960  | 16  | 927  | 21  |
| SU26-069 | 124 | 89   | 0.72 | 0.0010 | 0.0000 | 0.0482  | 0.0125  | 0.0065  | 0.0019 | 6.3  | 0.3 | 107   | 386  | 7    | 2   | 6.3  | 0.3 |
| SU26-070 | 148 | 125  | 0.84 | 0.0011 | 0.0001 | 0.1055  | 0.0059  | 0.0160  | 0.0015 | 7.1  | 0.3 | 1723  | 97   | 16   | 1   | 7.1  | 0.3 |

|          |     |     |      |        |        |        |        |        |        |      |     |      |     |      |     |      |     |
|----------|-----|-----|------|--------|--------|--------|--------|--------|--------|------|-----|------|-----|------|-----|------|-----|
| SU26-071 | 174 | 144 | 0.82 | 0.0015 | 0.0001 | 0.0462 | 0.0069 | 0.0095 | 0.0017 | 9.6  | 0.3 | 10   | 247 | 10   | 2   | 9.6  | 0.3 |
| SU26-072 | 83  | 85  | 1.03 | 0.0034 | 0.0002 | 0.0461 | 0.0043 | 0.0216 | 0.0027 | 22   | 1   | 1    | 168 | 22   | 3   | 22   | 1   |
| SU26-073 | 350 | 418 | 1.20 | 0.0010 | 0.0000 | 0.0462 | 0.0042 | 0.0066 | 0.0007 | 6.7  | 0.2 | 7    | 168 | 6.7  | 0.7 | 6.7  | 0.2 |
| SU26-074 | 304 | 668 | 2.20 | 0.0915 | 0.0022 | 0.0607 | 0.0007 | 0.7650 | 0.0203 | 564  | 13  | 628  | 24  | 577  | 12  | 564  | 13  |
| SU26-075 | 89  | 67  | 0.75 | 0.0019 | 0.0001 | 0.0626 | 0.0124 | 0.0165 | 0.0039 | 12.3 | 0.6 | 693  | 400 | 17   | 4   | 12.3 | 0.6 |
| SU26-076 | 166 | 93  | 0.56 | 0.1140 | 0.0029 | 0.0624 | 0.0007 | 0.9808 | 0.0265 | 696  | 16  | 688  | 24  | 694  | 14  | 696  | 16  |
| SU26-077 | 99  | 91  | 0.93 | 0.0011 | 0.0001 | 0.0461 | 0.0054 | 0.0068 | 0.0010 | 6.9  | 0.3 | 3    | 203 | 6.9  | 1   | 6.9  | 0.3 |
| SU26-078 | 101 | 54  | 0.53 | 0.0013 | 0.0001 | 0.0461 | 0.0032 | 0.0084 | 0.0008 | 8.5  | 0.3 | 2    | 123 | 8.5  | 0.8 | 8.5  | 0.3 |
| SU26-079 | 97  | 113 | 1.16 | 0.0061 | 0.0002 | 0.0901 | 0.0093 | 0.0763 | 0.0099 | 39   | 1   | 1428 | 190 | 75   | 9   | 39   | 1   |
| SU26-080 | 162 | 107 | 0.66 | 0.0014 | 0.0001 | 0.0525 | 0.0050 | 0.0103 | 0.0014 | 9.1  | 0.4 | 307  | 203 | 10   | 1   | 9.1  | 0.4 |
| SU26-081 | 229 | 224 | 0.98 | 0.0017 | 0.0001 | 0.0423 | 0.0048 | 0.0100 | 0.0015 | 11.1 | 0.4 | -160 | 177 | 10   | 1   | 11.1 | 0.4 |
| SU26-082 | 190 | 123 | 0.65 | 0.0014 | 0.0001 | 0.0509 | 0.0072 | 0.0098 | 0.0016 | 9    | 0.3 | 237  | 276 | 10   | 2   | 9    | 0.3 |
| SU26-083 | 785 | 935 | 1.19 | 0.0018 | 0.0001 | 0.0714 | 0.0063 | 0.0180 | 0.0020 | 11.7 | 0.3 | 970  | 173 | 18   | 2   | 11.7 | 0.3 |
| SU26-084 | 332 | 217 | 0.65 | 0.0092 | 0.0002 | 0.0486 | 0.0009 | 0.0613 | 0.0023 | 59   | 2   | 127  | 40  | 60   | 2   | 59   | 2   |
| SU26-085 | 319 | 361 | 1.13 | 0.0024 | 0.0001 | 0.0461 | 0.0013 | 0.0155 | 0.0007 | 15.7 | 0.4 | 3    | 50  | 15.6 | 0.7 | 15.7 | 0.4 |
| SU26-086 | 228 | 376 | 1.65 | 0.0014 | 0.0001 | 0.0408 | 0.0047 | 0.0081 | 0.0012 | 9.2  | 0.3 | -243 | 179 | 8    | 1   | 9.2  | 0.3 |
| SU26-087 | 112 | 98  | 0.88 | 0.0351 | 0.0009 | 0.0466 | 0.0008 | 0.2253 | 0.0079 | 222  | 6   | 29   | 33  | 206  | 7   | 222  | 6   |
| SU26-088 | 504 | 581 | 1.15 | 0.0100 | 0.0003 | 0.0493 | 0.0007 | 0.0678 | 0.0022 | 64   | 2   | 161  | 32  | 67   | 2   | 64   | 2   |
| SU26-089 | 84  | 60  | 0.71 | 0.0014 | 0.0001 | 0.0461 | 0.0005 | 0.0089 | 0.0004 | 9    | 0.4 | 2    | 18  | 9    | 0.4 | 9    | 0.4 |
| SU26-090 | 266 | 206 | 0.78 | 0.0012 | 0.0000 | 0.0796 | 0.0043 | 0.0133 | 0.0011 | 7.8  | 0.3 | 1187 | 101 | 13   | 1   | 7.8  | 0.3 |
| SU26-091 | 291 | 168 | 0.58 | 0.0009 | 0.0000 | 0.0574 | 0.0098 | 0.0070 | 0.0015 | 5.7  | 0.3 | 507  | 352 | 7    | 1   | 5.7  | 0.3 |
| SU26-092 | 226 | 98  | 0.43 | 0.0015 | 0.0001 | 0.0467 | 0.0081 | 0.0093 | 0.0020 | 9.3  | 0.4 | 33   | 276 | 9    | 2   | 9.3  | 0.4 |
| SU26-093 | 280 | 234 | 0.83 | 0.0011 | 0.0000 | 0.0412 | 0.0089 | 0.0063 | 0.0016 | 7.2  | 0.3 | -221 | 300 | 6    | 2   | 7.2  | 0.3 |
| SU26-094 | 122 | 79  | 0.65 | 0.0012 | 0.0001 | 0.0494 | 0.0178 | 0.0080 | 0.0033 | 7.5  | 0.5 | 166  | 593 | 8    | 3   | 7.5  | 0.5 |
| SU26-095 | 193 | 122 | 0.63 | 0.0012 | 0.0001 | 0.0467 | 0.0118 | 0.0074 | 0.0022 | 7.4  | 0.4 | 36   | 399 | 7    | 2   | 7.4  | 0.4 |

|          |      |      |      |        |        |        |        |        |        |     |    |     |     |     |    |     |    |
|----------|------|------|------|--------|--------|--------|--------|--------|--------|-----|----|-----|-----|-----|----|-----|----|
| 13SU36   |      |      |      |        |        |        |        |        |        |     |    |     |     |     |    |     |    |
| SU36-001 | 246  | 127  | 0.52 | 0.0579 | 0.0015 | 0.0544 | 0.0007 | 0.4343 | 0.0126 | 363 | 9  | 389 | 28  | 366 | 9  | 363 | 9  |
| SU36-002 | 736  | 533  | 0.72 | 0.0210 | 0.0006 | 0.0535 | 0.0007 | 0.1552 | 0.0045 | 134 | 3  | 351 | 28  | 147 | 4  | 134 | 3  |
| SU36-003 | 1051 | 208  | 0.20 | 0.0674 | 0.0017 | 0.0578 | 0.0014 | 0.5373 | 0.0228 | 421 | 10 | 522 | 54  | 437 | 15 | 421 | 10 |
| SU36-004 | 1070 | 1343 | 1.25 | 0.0204 | 0.0005 | 0.0518 | 0.0006 | 0.1452 | 0.0041 | 130 | 3  | 274 | 28  | 138 | 4  | 130 | 3  |
| SU36-005 | 202  | 198  | 0.98 | 0.0206 | 0.0006 | 0.0469 | 0.0036 | 0.1335 | 0.0126 | 132 | 3  | 46  | 157 | 127 | 11 | 132 | 3  |
| SU36-006 | 224  | 200  | 0.89 | 0.0206 | 0.0006 | 0.0485 | 0.0038 | 0.1376 | 0.0134 | 131 | 3  | 122 | 165 | 131 | 12 | 131 | 3  |
| SU36-007 | 360  | 410  | 1.14 | 0.0203 | 0.0005 | 0.0519 | 0.0007 | 0.1452 | 0.0047 | 129 | 3  | 281 | 32  | 138 | 4  | 129 | 3  |
| SU36-008 | 273  | 280  | 1.02 | 0.0229 | 0.0006 | 0.0581 | 0.0011 | 0.1839 | 0.0074 | 146 | 4  | 535 | 42  | 171 | 6  | 146 | 4  |
| SU36-009 | 219  | 244  | 1.12 | 0.0223 | 0.0006 | 0.0584 | 0.0009 | 0.1797 | 0.0062 | 142 | 4  | 544 | 34  | 168 | 5  | 142 | 4  |
| SU36-010 | 670  | 937  | 1.40 | 0.0202 | 0.0005 | 0.0565 | 0.0007 | 0.1575 | 0.0047 | 129 | 3  | 474 | 28  | 149 | 4  | 129 | 3  |

|          |      |      |      |        |        |        |        |        |        |     |    |      |     |     |    |     |    |
|----------|------|------|------|--------|--------|--------|--------|--------|--------|-----|----|------|-----|-----|----|-----|----|
| SU36-011 | 992  | 1302 | 1.31 | 0.0203 | 0.0005 | 0.0505 | 0.0006 | 0.1415 | 0.0041 | 130 | 3  | 217  | 29  | 134 | 4  | 130 | 3  |
| SU36-012 | 549  | 368  | 0.67 | 0.0202 | 0.0005 | 0.0478 | 0.0027 | 0.1329 | 0.0101 | 129 | 3  | 91   | 121 | 127 | 9  | 129 | 3  |
| SU36-013 | 437  | 382  | 0.87 | 0.0195 | 0.0005 | 0.0516 | 0.0009 | 0.1389 | 0.0051 | 125 | 3  | 266  | 38  | 132 | 5  | 125 | 3  |
| SU36-014 | 599  | 309  | 0.52 | 0.0418 | 0.0011 | 0.0557 | 0.0007 | 0.3213 | 0.0090 | 264 | 7  | 441  | 27  | 283 | 7  | 264 | 7  |
| SU36-015 | 251  | 229  | 0.91 | 0.0206 | 0.0006 | 0.0469 | 0.0038 | 0.1331 | 0.0133 | 131 | 4  | 44   | 169 | 127 | 12 | 131 | 4  |
| SU36-016 | 183  | 108  | 0.59 | 0.0211 | 0.0006 | 0.0510 | 0.0009 | 0.1483 | 0.0056 | 135 | 4  | 241  | 40  | 140 | 5  | 135 | 4  |
| SU36-017 | 368  | 258  | 0.70 | 0.0213 | 0.0006 | 0.0506 | 0.0007 | 0.1488 | 0.0048 | 136 | 4  | 222  | 32  | 141 | 4  | 136 | 4  |
| SU36-018 | 428  | 524  | 1.22 | 0.0208 | 0.0006 | 0.0820 | 0.0011 | 0.2349 | 0.0070 | 133 | 4  | 1245 | 25  | 214 | 6  | 133 | 4  |
| SU36-019 | 1054 | 1771 | 1.68 | 0.0197 | 0.0005 | 0.0461 | 0.0045 | 0.1251 | 0.0145 | 126 | 3  | 1    | 197 | 120 | 13 | 126 | 3  |
| SU36-020 | 178  | 98   | 0.55 | 0.0333 | 0.0009 | 0.0574 | 0.0009 | 0.2635 | 0.0088 | 211 | 6  | 506  | 32  | 237 | 7  | 211 | 6  |
| SU36-021 | 339  | 333  | 0.98 | 0.0204 | 0.0006 | 0.0547 | 0.0008 | 0.1535 | 0.0050 | 130 | 3  | 400  | 32  | 145 | 4  | 130 | 3  |
| SU36-022 | 747  | 1938 | 2.59 | 0.0201 | 0.0005 | 0.0567 | 0.0007 | 0.1570 | 0.0046 | 128 | 3  | 481  | 28  | 148 | 4  | 128 | 3  |
| SU36-023 | 388  | 401  | 1.03 | 0.0202 | 0.0006 | 0.0496 | 0.0042 | 0.1380 | 0.0147 | 129 | 4  | 174  | 185 | 131 | 13 | 129 | 4  |
| SU36-024 | 167  | 120  | 0.72 | 0.0209 | 0.0006 | 0.0461 | 0.0039 | 0.1329 | 0.0137 | 133 | 4  | 1    | 178 | 127 | 12 | 133 | 4  |
| SU36-025 | 353  | 355  | 1.01 | 0.0206 | 0.0006 | 0.0528 | 0.0046 | 0.1498 | 0.0164 | 131 | 4  | 321  | 194 | 142 | 14 | 131 | 4  |
| SU36-026 | 251  | 271  | 1.08 | 0.0210 | 0.0005 | 0.0461 | 0.0025 | 0.1332 | 0.0096 | 134 | 3  | 1    | 110 | 127 | 9  | 134 | 3  |
| SU36-027 | 85   | 48   | 0.57 | 0.0202 | 0.0006 | 0.0688 | 0.0016 | 0.1918 | 0.0088 | 129 | 4  | 891  | 48  | 178 | 7  | 129 | 4  |
| SU36-028 | 335  | 391  | 1.17 | 0.0200 | 0.0006 | 0.0484 | 0.0043 | 0.1332 | 0.0146 | 127 | 4  | 118  | 188 | 127 | 13 | 127 | 4  |
| SU36-030 | 1063 | 1517 | 1.43 | 0.0198 | 0.0005 | 0.0509 | 0.0006 | 0.1392 | 0.0040 | 127 | 3  | 235  | 27  | 132 | 4  | 127 | 3  |
| SU36-031 | 434  | 609  | 1.40 | 0.0198 | 0.0005 | 0.0564 | 0.0008 | 0.1539 | 0.0048 | 126 | 3  | 468  | 28  | 145 | 4  | 126 | 3  |
| SU36-032 | 1046 | 1923 | 1.84 | 0.0201 | 0.0005 | 0.0580 | 0.0007 | 0.1606 | 0.0046 | 128 | 3  | 531  | 25  | 151 | 4  | 128 | 3  |
| SU36-033 | 594  | 397  | 0.67 | 0.1070 | 0.0033 | 0.0606 | 0.0033 | 0.8932 | 0.0707 | 655 | 19 | 623  | 108 | 648 | 38 | 655 | 19 |
| SU36-034 | 189  | 207  | 1.09 | 0.0198 | 0.0007 | 0.0550 | 0.0061 | 0.1497 | 0.0209 | 126 | 4  | 411  | 227 | 142 | 18 | 126 | 4  |
| SU36-035 | 97   | 44   | 0.45 | 0.0586 | 0.0018 | 0.0559 | 0.0030 | 0.4513 | 0.0352 | 367 | 11 | 446  | 109 | 378 | 25 | 367 | 11 |
| SU36-037 | 105  | 120  | 1.14 | 0.0221 | 0.0008 | 0.0645 | 0.0076 | 0.1967 | 0.0291 | 141 | 5  | 759  | 233 | 182 | 25 | 141 | 5  |
| SU36-038 | 200  | 242  | 1.21 | 0.0210 | 0.0007 | 0.0504 | 0.0047 | 0.1458 | 0.0173 | 134 | 4  | 215  | 187 | 138 | 15 | 134 | 4  |
| SU36-039 | 751  | 1795 | 2.39 | 0.0203 | 0.0005 | 0.0514 | 0.0006 | 0.1436 | 0.0041 | 129 | 3  | 259  | 26  | 136 | 4  | 129 | 3  |
| SU36-040 | 94   | 90   | 0.97 | 0.0232 | 0.0009 | 0.0626 | 0.0087 | 0.2001 | 0.0342 | 148 | 6  | 694  | 278 | 185 | 29 | 148 | 6  |
| SU36-041 | 863  | 541  | 0.63 | 0.0210 | 0.0005 | 0.0496 | 0.0006 | 0.1438 | 0.0040 | 134 | 3  | 175  | 26  | 136 | 4  | 134 | 3  |
| SU36-042 | 161  | 87   | 0.54 | 0.0206 | 0.0006 | 0.0518 | 0.0028 | 0.1475 | 0.0117 | 132 | 4  | 278  | 115 | 140 | 10 | 132 | 4  |
| SU36-043 | 2435 | 2500 | 1.03 | 0.0176 | 0.0004 | 0.0512 | 0.0006 | 0.1246 | 0.0033 | 113 | 3  | 251  | 25  | 119 | 3  | 113 | 3  |
| SU36-044 | 148  | 116  | 0.79 | 0.0203 | 0.0006 | 0.0523 | 0.0014 | 0.1465 | 0.0071 | 130 | 3  | 298  | 57  | 139 | 6  | 130 | 3  |
| SU36-045 | 364  | 541  | 1.49 | 0.0201 | 0.0005 | 0.0574 | 0.0008 | 0.1587 | 0.0050 | 128 | 3  | 505  | 29  | 150 | 4  | 128 | 3  |
| SU36-046 | 222  | 221  | 1.00 | 0.0192 | 0.0007 | 0.0498 | 0.0057 | 0.1316 | 0.0188 | 122 | 4  | 186  | 225 | 126 | 17 | 122 | 4  |
| SU36-047 | 363  | 380  | 1.05 | 0.0210 | 0.0006 | 0.0478 | 0.0035 | 0.1386 | 0.0132 | 134 | 4  | 89   | 141 | 132 | 12 | 134 | 4  |
| SU36-048 | 777  | 605  | 0.78 | 0.0205 | 0.0005 | 0.0507 | 0.0006 | 0.1435 | 0.0041 | 131 | 3  | 229  | 27  | 136 | 4  | 131 | 3  |
| SU36-049 | 133  | 84   | 0.63 | 0.0207 | 0.0005 | 0.0499 | 0.0012 | 0.1421 | 0.0065 | 132 | 3  | 191  | 53  | 135 | 6  | 132 | 3  |

|          |      |      |      |        |        |         |         |         |        |      |     |        |       |      |     |      |     |
|----------|------|------|------|--------|--------|---------|---------|---------|--------|------|-----|--------|-------|------|-----|------|-----|
| SU36-050 | 208  | 227  | 1.09 | 0.0003 | 0.0000 | 0.7147  | 0.0276  | 0.0332  | 0.0028 | 2.2  | 0.2 | 4761   | 51    | 33   | 3   | 2.2  | 0.2 |
| 14SU09   |      |      |      |        |        |         |         |         |        |      |     |        |       |      |     |      |     |
| SU09-001 | 1353 | 694  | 0.51 | 0.0000 | 0.0000 | -1.2609 | -0.9730 | -0.0038 | 0.0011 | 0.1  | 0.1 | -26530 | 29705 | -4   | 1   | 0.1  | 0.1 |
| SU09-002 | 277  | 470  | 1.70 | 0.0001 | 0.0001 | 0.9759  | 0.3310  | 0.0096  | 0.0049 | 0.5  | 0.3 | 5203   | 510   | 10   | 5   | 0.5  | 0.3 |
| SU09-003 | 352  | 362  | 1.03 | 0.0001 | 0.0000 | 0.1354  | 0.3983  | 0.0011  | 0.0040 | 0.4  | 0.3 | 2170   | 4809  | 1    | 4   | 0.4  | 0.3 |
| SU09-004 | 213  | 108  | 0.51 | 0.3533 | 0.0083 | 0.1190  | 0.0013  | 5.7960  | 0.1460 | 1950 | 40  | 1941   | 18    | 1946 | 22  | 1941 | 18  |
| SU09-005 | 202  | 240  | 1.19 | 0.0002 | 0.0001 | 0.2743  | 0.2363  | 0.0072  | 0.0090 | 1.2  | 0.6 | 3331   | 2528  | 7    | 9   | 1.2  | 0.6 |
| SU09-006 | 1110 | 873  | 0.79 | 0.0001 | 0.0000 | 0.0463  | 0.0255  | 0.0005  | 0.0003 | 0.5  | 0.1 | 14     | 647   | 0.5  | 0.3 | 0.5  | 0.1 |
| SU09-007 | 153  | 195  | 1.27 | 0.0009 | 0.0001 | 0.6546  | 0.0350  | 0.0809  | 0.0099 | 5.8  | 0.6 | 4634   | 71    | 79   | 9   | 5.8  | 0.6 |
| SU09-008 | 191  | 335  | 1.76 | 0.0002 | 0.0001 | -0.0113 | -0.2443 | -0.0004 | 0.0075 | 1.5  | 0.5 | -2967  | 4303  | 0    | 8   | 1.5  | 0.5 |
| SU09-009 | 905  | 529  | 0.58 | 0.0325 | 0.0008 | 0.1219  | 0.0014  | 0.5454  | 0.0145 | 206  | 5   | 1984   | 19    | 442  | 10  | 206  | 5   |
| SU09-011 | 696  | 1416 | 2.03 | 0.0002 | 0.0000 | 0.8814  | 0.0512  | 0.0180  | 0.0022 | 1    | 0.1 | 5059   | 76    | 18   | 2   | 1    | 0.1 |
| SU09-013 | 296  | 378  | 1.28 | 0.0001 | 0.0001 | 0.1017  | 0.5337  | 0.0008  | 0.0047 | 0.4  | 0.3 | 1654   | 4995  | 1    | 5   | 0.4  | 0.3 |
| SU09-014 | 223  | 367  | 1.65 | 0.0000 | 0.0001 | -1.1803 | -6.3006 | -0.0035 | 0.0068 | 0.1  | 0.5 | -22594 | 24397 | -4   | 7   | 0.1  | 0.5 |
| SU09-016 | 143  | 136  | 0.95 | 0.0003 | 0.0001 | 0.1555  | 0.2335  | 0.0057  | 0.0106 | 1.7  | 0.7 | 2407   | 3062  | 6    | 11  | 1.7  | 0.7 |
| SU09-017 | 328  | 369  | 1.12 | 0.0000 | 0.0001 | 0.1292  | 2.3843  | 0.0003  | 0.0064 | 0.1  | 0.5 | 2087   | 27819 | 0    | 6   | 0.1  | 0.5 |
| SU09-018 | 189  | 225  | 1.19 | 0.0001 | 0.0001 | -0.3186 | -0.7091 | -0.0050 | 0.0077 | 0.7  | 0.5 | -783   | 16247 | -5   | 8   | 0.7  | 0.5 |
| SU09-019 | 236  | 397  | 1.68 | 0.0001 | 0.0001 | 0.4381  | 0.1851  | 0.0075  | 0.0065 | 0.8  | 0.5 | 4045   | 785   | 8    | 7   | 0.8  | 0.5 |
| SU09-020 | 105  | 170  | 1.62 | 0.0820 | 0.0020 | 0.0587  | 0.0011  | 0.6633  | 0.0253 | 508  | 12  | 556    | 39    | 517  | 15  | 508  | 12  |
| SU09-021 | 600  | 418  | 0.70 | 0.0000 | 0.0000 | -1.2442 | -1.8832 | -0.0050 | 0.0027 | 0.2  | 0.2 | -25676 | 29707 | -5   | 3   | 0.2  | 0.2 |
| SU09-022 | 733  | 162  | 0.22 | 0.3040 | 0.0073 | 0.1074  | 0.0013  | 4.5014  | 0.1209 | 1711 | 36  | 1756   | 20    | 1731 | 22  | 1756 | 20  |
| SU09-023 | 1662 | 1243 | 0.75 | 0.0001 | 0.0000 | -0.3323 | -0.1548 | -0.0027 | 0.0009 | 0.4  | 0.1 | -943   | 4429  | -2.8 | 0.9 | 0.4  | 0.1 |
| SU09-025 | 406  | 514  | 1.27 | 0.0006 | 0.0001 | 0.8091  | 0.0315  | 0.0652  | 0.0044 | 3.7  | 0.3 | 4938   | 51    | 64   | 4   | 3.7  | 0.3 |
| 14SU53   |      |      |      |        |        |         |         |         |        |      |     |        |       |      |     |      |     |
| SU53-002 | 430  | 590  | 1.37 | 0.0001 | 0.0000 | 0.1035  | 0.1849  | 0.0010  | 0.0021 | 0.5  | 0.1 | 1688   | 3288  | 1    | 2   | 0.5  | 0.1 |
| SU53-003 | 260  | 241  | 0.93 | 0.0002 | 0.0000 | 0.1634  | 0.1107  | 0.0035  | 0.0030 | 1    | 0.2 | 2491   | 1604  | 4    | 3   | 1    | 0.2 |
| SU53-004 | 1990 | 1038 | 0.52 | 0.0003 | 0.0000 | 0.0464  | 0.0102  | 0.0016  | 0.0004 | 1.6  | 0.1 | 17     | 316   | 1.6  | 0.4 | 1.6  | 0.1 |
| SU53-005 | 132  | 147  | 1.12 | 0.0843 | 0.0019 | 0.0584  | 0.0008  | 0.6788  | 0.0197 | 522  | 11  | 544    | 27    | 526  | 12  | 522  | 11  |
| SU53-006 | 612  | 526  | 0.86 | 0.0001 | 0.0000 | 0.2679  | 0.1097  | 0.0036  | 0.0022 | 0.6  | 0.1 | 3294   | 1582  | 4    | 2   | 0.6  | 0.1 |
| SU53-007 | 226  | 194  | 0.86 | 0.0180 | 0.0005 | 0.0672  | 0.0019  | 0.1669  | 0.0081 | 115  | 3   | 845    | 55    | 157  | 7   | 115  | 3   |
| SU53-009 | 218  | 240  | 1.10 | 0.0000 | 0.0000 | 0.9555  | 0.5933  | 0.0043  | 0.0043 | 0.2  | 0.3 | 5173   | 2789  | 4    | 4   | 0.2  | 0.3 |
| SU53-010 | 188  | 181  | 0.96 | 0.0004 | 0.0001 | 0.7955  | 0.0639  | 0.0414  | 0.0067 | 2.4  | 0.5 | 4914   | 109   | 41   | 7   | 2.4  | 0.5 |
| SU53-011 | 186  | 337  | 1.82 | 0.1343 | 0.0030 | 0.0698  | 0.0008  | 1.2924  | 0.0342 | 812  | 17  | 923    | 22    | 842  | 15  | 812  | 17  |
| SU53-012 | 1446 | 1719 | 1.19 | 0.0399 | 0.0009 | 0.0840  | 0.0009  | 0.4618  | 0.0119 | 252  | 5   | 1293   | 20    | 386  | 8   | 252  | 5   |
| SU53-014 | 235  | 361  | 1.53 | 0.1324 | 0.0029 | 0.0697  | 0.0008  | 1.2720  | 0.0322 | 801  | 17  | 920    | 21    | 833  | 14  | 801  | 17  |

|          |      |      |      |        |        |        |        |         |        |      |     |      |       |      |     |      |     |
|----------|------|------|------|--------|--------|--------|--------|---------|--------|------|-----|------|-------|------|-----|------|-----|
| SU53-015 | 648  | 812  | 1.25 | 0.0015 | 0.0001 | 0.0924 | 0.0247 | 0.0188  | 0.0059 | 9.5  | 0.5 | 1476 | 559   | 19   | 6   | 9.5  | 0.5 |
| SU53-016 | 180  | 133  | 0.74 | 0.0773 | 0.0018 | 0.0642 | 0.0011 | 0.6838  | 0.0235 | 480  | 11  | 749  | 33    | 529  | 14  | 480  | 11  |
| SU53-018 | 303  | 321  | 1.06 | 0.0001 | 0.0000 | 0.9198 | 0.1841 | 0.0115  | 0.0040 | 0.6  | 0.3 | 5120 | 295   | 12   | 4   | 0.6  | 0.3 |
| SU53-019 | 754  | 454  | 0.60 | 0.0001 | 0.0000 | 0.0333 | 0.1826 | 0.0002  | 0.0014 | 0.3  | 0.1 | -144 | 3518  | 0    | 1   | 0.3  | 0.1 |
| SU53-020 | 417  | 679  | 1.63 | 0.0001 | 0.0000 | 0.0463 | 0.0947 | 0.0004  | 0.0008 | 0.4  | 0.1 | 11   | 1487  | 0.4  | 0.8 | 0.4  | 0.1 |
| SU53-021 | 326  | 446  | 1.37 | 0.0001 | 0.0000 | 0.0465 | 0.1357 | 0.0004  | 0.0013 | 0.4  | 0.1 | 22   | 1978  | 0    | 1   | 0.4  | 0.1 |
| SU53-022 | 288  | 77   | 0.27 | 0.2071 | 0.0046 | 0.0831 | 0.0009 | 2.3715  | 0.0580 | 1213 | 24  | 1271 | 19    | 1234 | 17  | 1271 | 19  |
| SU53-023 | 261  | 263  | 1.01 | 0.0002 | 0.0000 | 0.2071 | 0.1269 | 0.0049  | 0.0040 | 1.1  | 0.3 | 2883 | 1808  | 5    | 4   | 1.1  | 0.3 |
| SU53-024 | 380  | 543  | 1.43 | 0.0001 | 0.0000 | 0.0465 | 0.1479 | 0.0005  | 0.0017 | 0.5  | 0.1 | 24   | 2108  | 1    | 2   | 0.5  | 0.1 |
| SU53-025 | 477  | 535  | 1.12 | 0.0000 | 0.0000 | 2.3087 | 3.6838 | 0.0045  | 0.0021 | 0.1  | 0.1 | 6389 | 13361 | 5    | 2   | 0.1  | 0.1 |
| SU53-026 | 361  | 228  | 0.63 | 0.1270 | 0.0030 | 0.0695 | 0.0011 | 1.2173  | 0.0400 | 771  | 17  | 915  | 29    | 809  | 18  | 771  | 17  |
| SU53-027 | 1004 | 1288 | 1.28 | 0.0002 | 0.0000 | 0.7056 | 0.0351 | 0.0176  | 0.0016 | 1.2  | 0.1 | 4742 | 66    | 18   | 2   | 1.2  | 0.1 |
| SU53-029 | 1318 | 1627 | 1.23 | 0.0002 | 0.0000 | 0.6956 | 0.0150 | 0.0225  | 0.0011 | 1.5  | 0.1 | 4722 | 29    | 23   | 1   | 1.5  | 0.1 |
| SU53-030 | 278  | 178  | 0.64 | 0.1663 | 0.0037 | 0.0737 | 0.0008 | 1.6905  | 0.0416 | 992  | 21  | 1034 | 20    | 1005 | 16  | 992  | 21  |
| SU53-031 | 245  | 240  | 0.98 | 0.0001 | 0.0001 | 1.0986 | 0.2951 | 0.0181  | 0.0053 | 0.8  | 0.4 | 5369 | 438   | 18   | 5   | 0.8  | 0.4 |
| SU53-035 | 517  | 455  | 0.88 | 0.1304 | 0.0029 | 0.0669 | 0.0007 | 1.2023  | 0.0299 | 790  | 17  | 834  | 22    | 802  | 14  | 790  | 17  |
| SU53-036 | 253  | 265  | 1.05 | 0.0003 | 0.0001 | 0.8581 | 0.0767 | 0.0302  | 0.0043 | 1.7  | 0.3 | 5021 | 126   | 30   | 4   | 1.7  | 0.3 |
| SU53-037 | 552  | 12   | 0.02 | 0.0932 | 0.0021 | 0.0616 | 0.0008 | 0.7916  | 0.0225 | 574  | 13  | 661  | 28    | 592  | 13  | 574  | 13  |
| SU53-038 | 164  | 131  | 0.80 | 0.0002 | 0.0001 | 0.7119 | 0.1039 | 0.0208  | 0.0065 | 1.4  | 0.5 | 4755 | 215   | 21   | 7   | 1.4  | 0.5 |
| SU53-039 | 196  | 102  | 0.52 | 0.5642 | 0.0128 | 0.2165 | 0.0023 | 16.8414 | 0.4020 | 2884 | 53  | 2955 | 16    | 2926 | 23  | 2955 | 16  |
| SU53-040 | 87   | 53   | 0.60 | 0.2418 | 0.0055 | 0.0900 | 0.0010 | 3.0000  | 0.0771 | 1396 | 29  | 1425 | 21    | 1408 | 20  | 1425 | 21  |
| SU53-041 | 226  | 131  | 0.58 | 0.3458 | 0.0078 | 0.1235 | 0.0013 | 5.8891  | 0.1434 | 1914 | 37  | 2008 | 18    | 1960 | 21  | 2008 | 18  |
| SU53-042 | 386  | 62   | 0.16 | 0.1176 | 0.0027 | 0.0632 | 0.0007 | 1.0247  | 0.0257 | 717  | 15  | 715  | 23    | 716  | 13  | 717  | 15  |
| SU53-043 | 1329 | 662  | 0.50 | 0.0001 | 0.0000 | 0.0237 | 0.1067 | 0.0002  | 0.0008 | 0.3  | 0.1 | -576 | 2536  | 0.2  | 0.8 | 0.3  | 0.1 |
| SU53-044 | 779  | 247  | 0.32 | 0.3036 | 0.0068 | 0.1107 | 0.0012 | 4.6322  | 0.1116 | 1709 | 34  | 1811 | 19    | 1755 | 20  | 1811 | 19  |
| SU53-045 | 256  | 16   | 0.06 | 0.1587 | 0.0036 | 0.0719 | 0.0008 | 1.5728  | 0.0397 | 949  | 20  | 983  | 22    | 960  | 16  | 949  | 20  |
| SU53-048 | 329  | 459  | 1.40 | 0.0006 | 0.0001 | 0.9853 | 0.0480 | 0.0783  | 0.0059 | 3.7  | 0.4 | 5217 | 67    | 77   | 6   | 3.7  | 0.4 |
| SU53-049 | 1530 | 469  | 0.31 | 0.0619 | 0.0014 | 0.0598 | 0.0007 | 0.5100  | 0.0129 | 387  | 8   | 595  | 23    | 418  | 9   | 387  | 8   |
| SU53-050 | 1919 | 1024 | 0.53 | 0.0001 | 0.0000 | 0.0472 | 0.0734 | 0.0003  | 0.0005 | 0.3  | 0.1 | 57   | 1647  | 0.3  | 0.5 | 0.3  | 0.1 |
| SU53-051 | 936  | 1502 | 1.60 | 0.0000 | 0.0000 | 0.2427 | 0.1305 | 0.0010  | 0.0007 | 0.2  | 0.1 | 3137 | 2396  | 1    | 0.8 | 0.2  | 0.1 |
| SU53-054 | 294  | 297  | 1.01 | 0.0000 | 0.0000 | 1.7047 | 2.2372 | 0.0041  | 0.0034 | 0.1  | 0.3 | 5977 | 17071 | 4    | 3   | 0.1  | 0.3 |
| SU53-055 | 750  | 348  | 0.46 | 0.0708 | 0.0016 | 0.0572 | 0.0006 | 0.5583  | 0.0140 | 441  | 10  | 501  | 23    | 450  | 9   | 441  | 10  |
| SU53-056 | 487  | 181  | 0.37 | 0.3040 | 0.0073 | 0.1052 | 0.0018 | 4.4082  | 0.1562 | 1711 | 36  | 1717 | 31    | 1714 | 29  | 1717 | 31  |
| SU53-058 | 700  | 1001 | 1.43 | 0.0001 | 0.0000 | 0.1638 | 0.1276 | 0.0014  | 0.0015 | 0.4  | 0.1 | 2495 | 2185  | 1    | 1   | 0.4  | 0.1 |
| SU53-059 | 250  | 236  | 0.94 | 0.0000 | 0.0000 | 0.0817 | 1.2794 | 0.0002  | 0.0040 | 0.1  | 0.3 | 1238 | 22701 | 0    | 4   | 0.1  | 0.3 |
| SU53-061 | 1471 | 636  | 0.43 | 0.0001 | 0.0000 | 0.0473 | 0.0976 | 0.0003  | 0.0007 | 0.3  | 0.1 | 62   | 2347  | 0.3  | 0.8 | 0.3  | 0.1 |
| SU53-062 | 68   | 50   | 0.73 | 0.1510 | 0.0035 | 0.0709 | 0.0010 | 1.4755  | 0.0450 | 907  | 20  | 954  | 28    | 920  | 18  | 907  | 20  |

|          |      |      |      |        |        |         |         |         |        |      |     |        |       |      |     |      |     |
|----------|------|------|------|--------|--------|---------|---------|---------|--------|------|-----|--------|-------|------|-----|------|-----|
| SU53-063 | 1834 | 1197 | 0.65 | 0.0001 | 0.0000 | 0.3502  | 0.0882  | 0.0045  | 0.0020 | 0.6  | 0.1 | 3708   | 1024  | 5    | 2   | 0.6  | 0.1 |
| SU53-064 | 121  | 82   | 0.68 | 0.1852 | 0.0043 | 0.0784  | 0.0009  | 2.0009  | 0.0517 | 1095 | 23  | 1156   | 21    | 1116 | 17  | 1156 | 21  |
| SU53-065 | 455  | 733  | 1.61 | 0.0002 | 0.0000 | 0.2946  | 0.0826  | 0.0063  | 0.0031 | 1    | 0.3 | 3442   | 439   | 6    | 3   | 1    | 0.3 |
| SU53-066 | 134  | 75   | 0.56 | 0.3081 | 0.0071 | 0.1094  | 0.0012  | 4.6451  | 0.1140 | 1731 | 35  | 1789   | 18    | 1757 | 21  | 1789 | 18  |
| SU53-067 | 634  | 324  | 0.51 | 0.4425 | 0.0101 | 0.1598  | 0.0017  | 9.7515  | 0.2338 | 2362 | 45  | 2454   | 17    | 2412 | 22  | 2454 | 17  |
| SU53-068 | 433  | 154  | 0.36 | 0.2895 | 0.0066 | 0.1049  | 0.0011  | 4.1849  | 0.1013 | 1639 | 33  | 1712   | 18    | 1671 | 20  | 1712 | 18  |
| SU53-069 | 300  | 426  | 1.42 | 0.0001 | 0.0000 | 0.3404  | 0.2006  | 0.0038  | 0.0038 | 0.5  | 0.3 | 3665   | 1327  | 4    | 4   | 0.5  | 0.3 |
| SU53-070 | 381  | 393  | 1.03 | 0.0014 | 0.0001 | 0.0208  | 0.0137  | 0.0040  | 0.0028 | 9    | 0.4 | -718   | 617   | 4    | 3   | 9    | 0.4 |
| SU53-071 | 219  | 89   | 0.41 | 0.1785 | 0.0041 | 0.0764  | 0.0009  | 1.8789  | 0.0479 | 1059 | 22  | 1105   | 21    | 1074 | 17  | 1105 | 21  |
| SU53-072 | 377  | 404  | 1.07 | 0.0000 | 0.0000 | -1.3157 | -2.8332 | -0.0039 | 0.0027 | 0.1  | 0.2 | -29482 | 32023 | -4   | 3   | 0.1  | 0.2 |
| SU53-074 | 160  | 68   | 0.42 | 0.1640 | 0.0038 | 0.0777  | 0.0009  | 1.7551  | 0.0465 | 979  | 21  | 1138   | 22    | 1029 | 17  | 979  | 21  |
| SU53-075 | 751  | 1303 | 1.73 | 0.0001 | 0.0000 | 0.8465  | 0.0678  | 0.0126  | 0.0022 | 0.7  | 0.1 | 5002   | 107   | 13   | 2   | 0.7  | 0.1 |
| SU53-077 | 145  | 31   | 0.21 | 0.1382 | 0.0031 | 0.0682  | 0.0012  | 1.2984  | 0.0452 | 834  | 18  | 873    | 34    | 845  | 20  | 834  | 18  |
| SU53-078 | 642  | 476  | 0.74 | 0.0341 | 0.0008 | 0.0530  | 0.0006  | 0.2494  | 0.0068 | 216  | 5   | 330    | 25    | 226  | 6   | 216  | 5   |
| SU53-079 | 247  | 210  | 0.85 | 0.5126 | 0.0118 | 0.1790  | 0.0019  | 12.6530 | 0.3040 | 2668 | 50  | 2644   | 16    | 2654 | 23  | 2644 | 16  |
| SU53-080 | 670  | 472  | 0.70 | 0.0001 | 0.0000 | 0.0466  | 0.0926  | 0.0004  | 0.0009 | 0.4  | 0.1 | 28     | 1493  | 0.4  | 0.9 | 0.4  | 0.1 |
| SU53-081 | 341  | 443  | 1.30 | 0.0000 | 0.0000 | 0.8648  | 0.3956  | 0.0040  | 0.0031 | 0.2  | 0.2 | 5032   | 1287  | 4    | 3   | 0.2  | 0.2 |
| SU53-082 | 367  | 424  | 1.15 | 0.0001 | 0.0000 | 1.3549  | 0.2855  | 0.0145  | 0.0030 | 0.5  | 0.2 | 5661   | 298   | 15   | 3   | 0.5  | 0.2 |
| SU53-083 | 119  | 128  | 1.08 | 0.0852 | 0.0020 | 0.0621  | 0.0009  | 0.7303  | 0.0229 | 527  | 12  | 679    | 28    | 557  | 13  | 527  | 12  |
| SU53-084 | 239  | 262  | 1.09 | 0.0001 | 0.0001 | 0.0471  | 0.2172  | 0.0009  | 0.0044 | 0.9  | 0.3 | 52     | 4163  | 1    | 5   | 0.9  | 0.3 |
| SU53-086 | 123  | 98   | 0.80 | 0.1760 | 0.0041 | 0.0760  | 0.0009  | 1.8439  | 0.0501 | 1045 | 23  | 1095   | 22    | 1061 | 18  | 1095 | 22  |
| SU53-087 | 407  | 529  | 1.30 | 0.0000 | 0.0000 | 0.9972  | 0.8028  | 0.0030  | 0.0027 | 0.1  | 0.2 | 5233   | 3728  | 3    | 3   | 0.1  | 0.2 |
| SU53-089 | 402  | 151  | 0.38 | 0.2609 | 0.0060 | 0.0932  | 0.0010  | 3.3516  | 0.0815 | 1495 | 31  | 1491   | 19    | 1493 | 19  | 1491 | 19  |
| SU53-091 | 319  | 137  | 0.43 | 0.0564 | 0.0013 | 0.0565  | 0.0007  | 0.4392  | 0.0124 | 354  | 8   | 472    | 26    | 370  | 9   | 354  | 8   |
| SU53-092 | 199  | 120  | 0.60 | 0.2343 | 0.0056 | 0.0845  | 0.0026  | 2.7300  | 0.1327 | 1357 | 29  | 1304   | 55    | 1337 | 36  | 1304 | 55  |
| SU53-093 | 252  | 112  | 0.45 | 0.0001 | 0.0000 | 0.0016  | 0.3323  | 0.0000  | 0.0041 | 0.6  | 0.3 | -1894  | 4593  | 0    | 4   | 0.6  | 0.3 |
| SU53-094 | 605  | 44   | 0.07 | 0.1761 | 0.0041 | 0.0754  | 0.0008  | 1.8296  | 0.0452 | 1045 | 22  | 1078   | 20    | 1056 | 16  | 1078 | 20  |
| SU53-095 | 359  | 168  | 0.47 | 0.0000 | 0.0000 | 4.3573  | 10.9876 | 0.0054  | 0.0029 | 0.1  | 0.2 | 7238   | 16924 | 5    | 3   | 0.1  | 0.2 |
| SU53-096 | 379  | 176  | 0.46 | 0.1753 | 0.0041 | 0.0752  | 0.0008  | 1.8178  | 0.0459 | 1041 | 22  | 1074   | 20    | 1052 | 17  | 1074 | 20  |
| SU53-097 | 333  | 320  | 0.96 | 0.0001 | 0.0000 | 0.1184  | 0.2993  | 0.0011  | 0.0031 | 0.5  | 0.2 | 1932   | 4328  | 1    | 3   | 0.5  | 0.2 |
| SU53-098 | 1194 | 250  | 0.21 | 0.1037 | 0.0024 | 0.0613  | 0.0007  | 0.8757  | 0.0222 | 636  | 14  | 649    | 22    | 639  | 12  | 636  | 14  |
| SU53-099 | 824  | 320  | 0.39 | 0.0263 | 0.0006 | 0.0540  | 0.0007  | 0.1958  | 0.0058 | 167  | 4   | 370    | 28    | 182  | 5   | 167  | 4   |
| SU53-100 | 286  | 337  | 1.18 | 0.0000 | 0.0000 | -1.2650 | -3.5816 | -0.0041 | 0.0036 | 0.1  | 0.3 | -26741 | 29496 | -4   | 4   | 0.1  | 0.3 |
| 14SU54   |      |      |      |        |        |         |         |         |        |      |     |        |       |      |     |      |     |
| SU54-001 | 421  | 63   | 0.15 | 0.3183 | 0.0069 | 0.1115  | 0.0011  | 4.8920  | 0.1114 | 1781 | 34  | 1824   | 19    | 1801 | 19  | 1824 | 19  |
| SU54-002 | 236  | 170  | 0.72 | 0.4415 | 0.0098 | 0.1567  | 0.0016  | 9.5351  | 0.2238 | 2357 | 44  | 2420   | 18    | 2391 | 22  | 2420 | 18  |

|          |      |     |      |        |        |        |        |         |        |      |     |      |      |      |     |      |     |
|----------|------|-----|------|--------|--------|--------|--------|---------|--------|------|-----|------|------|------|-----|------|-----|
| SU54-004 | 11   | 0   | 0.05 | 0.1515 | 0.0039 | 0.0841 | 0.0045 | 1.7570  | 0.1298 | 909  | 22  | 1295 | 106  | 1030 | 48  | 909  | 22  |
| SU54-005 | 449  | 244 | 0.54 | 0.1638 | 0.0036 | 0.0738 | 0.0008 | 1.6664  | 0.0394 | 978  | 20  | 1035 | 22   | 996  | 15  | 978  | 20  |
| SU54-006 | 132  | 115 | 0.87 | 0.2445 | 0.0054 | 0.0917 | 0.0010 | 3.0911  | 0.0757 | 1410 | 28  | 1461 | 21   | 1430 | 19  | 1461 | 21  |
| SU54-007 | 730  | 344 | 0.47 | 0.1801 | 0.0040 | 0.0751 | 0.0008 | 1.8636  | 0.0440 | 1067 | 22  | 1070 | 21   | 1068 | 16  | 1070 | 21  |
| SU54-008 | 420  | 357 | 0.85 | 0.1615 | 0.0036 | 0.0729 | 0.0008 | 1.6223  | 0.0392 | 965  | 20  | 1011 | 22   | 979  | 15  | 965  | 20  |
| SU54-009 | 103  | 22  | 0.21 | 0.1237 | 0.0028 | 0.0688 | 0.0009 | 1.1729  | 0.0344 | 752  | 16  | 892  | 28   | 788  | 16  | 752  | 16  |
| SU54-011 | 484  | 334 | 0.69 | 0.0571 | 0.0013 | 0.0544 | 0.0006 | 0.4281  | 0.0115 | 358  | 8   | 387  | 27   | 362  | 8   | 358  | 8   |
| SU54-012 | 272  | 162 | 0.60 | 0.1587 | 0.0035 | 0.0706 | 0.0008 | 1.5445  | 0.0393 | 949  | 20  | 946  | 23   | 948  | 16  | 949  | 20  |
| SU54-013 | 181  | 91  | 0.51 | 0.1125 | 0.0025 | 0.0642 | 0.0008 | 0.9958  | 0.0276 | 687  | 15  | 749  | 27   | 702  | 14  | 687  | 15  |
| SU54-014 | 115  | 80  | 0.70 | 0.1507 | 0.0034 | 0.0700 | 0.0008 | 1.4547  | 0.0391 | 905  | 19  | 929  | 25   | 912  | 16  | 905  | 19  |
| SU54-015 | 69   | 54  | 0.78 | 0.1940 | 0.0044 | 0.0788 | 0.0010 | 2.1086  | 0.0585 | 1143 | 24  | 1168 | 25   | 1152 | 19  | 1168 | 25  |
| SU54-016 | 89   | 65  | 0.72 | 0.1951 | 0.0044 | 0.0807 | 0.0009 | 2.1716  | 0.0575 | 1149 | 24  | 1215 | 24   | 1172 | 18  | 1215 | 24  |
| SU54-017 | 300  | 416 | 1.39 | 0.2750 | 0.0061 | 0.0986 | 0.0010 | 3.7385  | 0.0893 | 1566 | 31  | 1598 | 20   | 1580 | 19  | 1598 | 20  |
| SU54-018 | 86   | 82  | 0.95 | 0.2846 | 0.0064 | 0.1031 | 0.0011 | 4.0443  | 0.1025 | 1614 | 32  | 1680 | 21   | 1643 | 21  | 1680 | 21  |
| SU54-019 | 11   | 0   | 0.03 | 0.0472 | 0.0067 | 0.3121 | 0.0660 | 2.0321  | 0.6928 | 297  | 41  | 3531 | 394  | 1126 | 232 | 297  | 41  |
| SU54-020 | 230  | 158 | 0.69 | 0.0082 | 0.0002 | 0.0378 | 0.0048 | 0.0424  | 0.0064 | 52   | 1   | -425 | 279  | 42   | 6   | 52   | 1   |
| SU54-021 | 177  | 101 | 0.57 | 0.3101 | 0.0069 | 0.1086 | 0.0012 | 4.6404  | 0.1142 | 1741 | 34  | 1775 | 20   | 1757 | 21  | 1775 | 20  |
| SU54-022 | 213  | 133 | 0.62 | 0.1874 | 0.0042 | 0.0791 | 0.0009 | 2.0425  | 0.0518 | 1107 | 23  | 1173 | 23   | 1130 | 17  | 1173 | 23  |
| SU54-024 | 46   | 56  | 1.21 | 0.2689 | 0.0062 | 0.0996 | 0.0013 | 3.6900  | 0.1044 | 1535 | 31  | 1616 | 24   | 1569 | 23  | 1616 | 24  |
| SU54-025 | 527  | 213 | 0.40 | 0.1667 | 0.0036 | 0.0707 | 0.0021 | 1.6245  | 0.0720 | 994  | 20  | 948  | 63   | 980  | 28  | 994  | 20  |
| SU54-027 | 223  | 149 | 0.67 | 0.1338 | 0.0030 | 0.0664 | 0.0007 | 1.2235  | 0.0312 | 809  | 17  | 817  | 24   | 811  | 14  | 809  | 17  |
| SU54-028 | 301  | 263 | 0.87 | 0.3270 | 0.0074 | 0.1116 | 0.0012 | 5.0311  | 0.1225 | 1824 | 36  | 1826 | 19   | 1825 | 21  | 1826 | 19  |
| SU54-029 | 777  | 195 | 0.25 | 0.1517 | 0.0034 | 0.0705 | 0.0007 | 1.4740  | 0.0351 | 910  | 19  | 942  | 21   | 920  | 14  | 910  | 19  |
| SU54-030 | 167  | 146 | 0.87 | 0.0983 | 0.0022 | 0.0595 | 0.0008 | 0.8063  | 0.0229 | 604  | 13  | 586  | 27   | 600  | 13  | 604  | 13  |
| SU54-031 | 603  | 355 | 0.59 | 0.0082 | 0.0002 | 0.0476 | 0.0017 | 0.0535  | 0.0029 | 52   | 1   | 77   | 75   | 53   | 3   | 52   | 1   |
| SU54-032 | 423  | 263 | 0.62 | 0.4508 | 0.0101 | 0.1616 | 0.0017 | 10.0451 | 0.2390 | 2399 | 45  | 2473 | 17   | 2439 | 22  | 2473 | 17  |
| SU54-033 | 255  | 122 | 0.48 | 0.0910 | 0.0021 | 0.0599 | 0.0007 | 0.7521  | 0.0202 | 562  | 12  | 601  | 25   | 569  | 12  | 562  | 12  |
| SU54-034 | 295  | 313 | 1.06 | 0.0002 | 0.0001 | 0.3126 | 0.1403 | 0.0071  | 0.0052 | 1.1  | 0.4 | 3534 | 2615 | 7    | 5   | 1.1  | 0.4 |
| SU54-035 | 57   | 27  | 0.47 | 0.2360 | 0.0054 | 0.0897 | 0.0011 | 2.9184  | 0.0813 | 1366 | 28  | 1419 | 23   | 1387 | 21  | 1419 | 23  |
| SU54-036 | 78   | 163 | 2.09 | 0.1446 | 0.0035 | 0.0694 | 0.0013 | 1.3823  | 0.0523 | 871  | 20  | 909  | 39   | 881  | 22  | 871  | 20  |
| SU54-037 | 416  | 278 | 0.67 | 0.0039 | 0.0001 | 0.0461 | 0.0020 | 0.0245  | 0.0014 | 24.8 | 0.6 | 2    | 84   | 25   | 1   | 24.8 | 0.6 |
| SU54-038 | 1007 | 14  | 0.01 | 0.4409 | 0.0099 | 0.1569 | 0.0017 | 9.5392  | 0.2335 | 2355 | 44  | 2423 | 18   | 2391 | 22  | 2423 | 18  |
| SU54-039 | 128  | 75  | 0.59 | 0.1969 | 0.0044 | 0.0791 | 0.0009 | 2.1468  | 0.0542 | 1159 | 24  | 1174 | 21   | 1164 | 17  | 1174 | 21  |
| SU54-040 | 874  | 42  | 0.05 | 0.0873 | 0.0019 | 0.0601 | 0.0008 | 0.7228  | 0.0200 | 539  | 11  | 606  | 27   | 552  | 12  | 539  | 11  |
| SU54-042 | 292  | 252 | 0.86 | 0.3077 | 0.0069 | 0.1097 | 0.0011 | 4.6544  | 0.1105 | 1729 | 34  | 1795 | 19   | 1759 | 20  | 1795 | 19  |
| SU54-043 | 202  | 124 | 0.62 | 0.2622 | 0.0059 | 0.0942 | 0.0010 | 3.4036  | 0.0825 | 1501 | 30  | 1512 | 20   | 1505 | 19  | 1512 | 20  |
| SU54-044 | 379  | 25  | 0.07 | 0.0992 | 0.0022 | 0.0610 | 0.0007 | 0.8345  | 0.0212 | 610  | 13  | 640  | 23   | 616  | 12  | 610  | 13  |

|          |      |      |      |        |        |        |        |        |        |      |     |      |      |      |     |      |     |
|----------|------|------|------|--------|--------|--------|--------|--------|--------|------|-----|------|------|------|-----|------|-----|
| SU54-045 | 339  | 218  | 0.64 | 0.1904 | 0.0043 | 0.0786 | 0.0009 | 2.0642 | 0.0511 | 1123 | 23  | 1163 | 21   | 1137 | 17  | 1163 | 21  |
| SU54-046 | 216  | 161  | 0.75 | 0.1138 | 0.0027 | 0.0645 | 0.0009 | 1.0119 | 0.0317 | 695  | 15  | 758  | 30   | 710  | 16  | 695  | 15  |
| SU54-047 | 145  | 104  | 0.72 | 0.0377 | 0.0009 | 0.0518 | 0.0015 | 0.2691 | 0.0133 | 238  | 6   | 277  | 67   | 242  | 11  | 238  | 6   |
| SU54-049 | 250  | 153  | 0.61 | 0.1973 | 0.0045 | 0.0800 | 0.0009 | 2.1758 | 0.0553 | 1161 | 24  | 1197 | 21   | 1173 | 18  | 1197 | 21  |
| SU54-050 | 408  | 27   | 0.07 | 0.2276 | 0.0051 | 0.0868 | 0.0010 | 2.7220 | 0.0683 | 1322 | 27  | 1355 | 21   | 1334 | 19  | 1355 | 21  |
| SU54-051 | 187  | 104  | 0.56 | 0.0153 | 0.0004 | 0.0515 | 0.0030 | 0.1086 | 0.0086 | 98   | 2   | 264  | 130  | 105  | 8   | 98   | 2   |
| SU54-052 | 90   | 68   | 0.75 | 0.0946 | 0.0026 | 0.0690 | 0.0047 | 0.8989 | 0.0814 | 582  | 15  | 897  | 144  | 651  | 44  | 582  | 15  |
| SU54-053 | 230  | 149  | 0.65 | 0.1959 | 0.0044 | 0.0795 | 0.0009 | 2.1477 | 0.0525 | 1153 | 24  | 1185 | 21   | 1164 | 17  | 1185 | 21  |
| SU54-054 | 257  | 125  | 0.49 | 0.1960 | 0.0044 | 0.0798 | 0.0009 | 2.1564 | 0.0525 | 1154 | 24  | 1192 | 21   | 1167 | 17  | 1192 | 21  |
| SU54-056 | 351  | 226  | 0.64 | 0.2960 | 0.0068 | 0.1053 | 0.0012 | 4.2974 | 0.1119 | 1672 | 34  | 1719 | 20   | 1693 | 21  | 1719 | 20  |
| SU54-058 | 589  | 734  | 1.25 | 0.0001 | 0.0000 | 0.7541 | 0.1723 | 0.0063 | 0.0024 | 0.4  | 0.2 | 4837 | 387  | 6    | 2   | 0.4  | 0.2 |
| SU54-059 | 143  | 119  | 0.84 | 0.0002 | 0.0001 | 0.9717 | 0.2941 | 0.0220 | 0.0095 | 1    | 0.6 | 5197 | 690  | 22   | 9   | 1    | 0.6 |
| SU54-060 | 1001 | 1386 | 1.39 | 0.0146 | 0.0004 | 0.0608 | 0.0073 | 0.1225 | 0.0174 | 94   | 3   | 633  | 266  | 117  | 16  | 94   | 3   |
| SU54-062 | 386  | 1012 | 2.62 | 0.0001 | 0.0000 | 0.1147 | 0.1709 | 0.0016 | 0.0028 | 0.6  | 0.3 | 1876 | 2563 | 2    | 3   | 0.6  | 0.3 |
| SU54-063 | 185  | 182  | 0.99 | 0.0004 | 0.0001 | 0.2926 | 0.0985 | 0.0177 | 0.0095 | 2.8  | 0.6 | 3431 | 1310 | 18   | 9   | 2.8  | 0.6 |
| SU54-064 | 594  | 492  | 0.83 | 0.1838 | 0.0041 | 0.0784 | 0.0008 | 1.9848 | 0.0472 | 1087 | 22  | 1156 | 20   | 1110 | 16  | 1156 | 20  |
| SU54-067 | 484  | 115  | 0.24 | 0.1800 | 0.0041 | 0.0759 | 0.0008 | 1.8845 | 0.0479 | 1067 | 22  | 1093 | 21   | 1076 | 17  | 1093 | 21  |
| SU54-068 | 159  | 101  | 0.64 | 0.0156 | 0.0005 | 0.0582 | 0.0057 | 0.1250 | 0.0153 | 100  | 3   | 538  | 216  | 120  | 14  | 100  | 3   |
| SU54-069 | 30   | 1    | 0.05 | 0.0900 | 0.0029 | 0.0693 | 0.0054 | 0.8600 | 0.0907 | 555  | 17  | 909  | 161  | 630  | 49  | 555  | 17  |
| SU54-070 | 60   | 68   | 1.14 | 0.1984 | 0.0046 | 0.0814 | 0.0011 | 2.2263 | 0.0654 | 1167 | 25  | 1231 | 25   | 1189 | 21  | 1231 | 25  |
| SU54-071 | 675  | 584  | 0.87 | 0.0053 | 0.0001 | 0.0461 | 0.0006 | 0.0336 | 0.0009 | 34   | 0.8 | 1    | 21   | 33.5 | 0.9 | 34   | 0.8 |
| SU54-072 | 298  | 142  | 0.48 | 0.2791 | 0.0063 | 0.0996 | 0.0011 | 3.8318 | 0.0953 | 1587 | 32  | 1617 | 20   | 1599 | 20  | 1617 | 20  |
| SU54-073 | 7    | 6    | 0.86 | 0.1155 | 0.0056 | 0.0667 | 0.0151 | 1.0615 | 0.2854 | 704  | 32  | 828  | 481  | 735  | 141 | 704  | 32  |
| SU54-075 | 1258 | 215  | 0.17 | 0.0967 | 0.0022 | 0.0658 | 0.0007 | 0.8770 | 0.0223 | 595  | 13  | 800  | 23   | 639  | 12  | 595  | 13  |
| SU54-076 | 690  | 830  | 1.20 | 0.0933 | 0.0021 | 0.0590 | 0.0006 | 0.7584 | 0.0186 | 575  | 12  | 567  | 23   | 573  | 11  | 575  | 12  |
| SU54-077 | 116  | 44   | 0.38 | 0.3074 | 0.0076 | 0.1080 | 0.0021 | 4.5768 | 0.1783 | 1728 | 37  | 1766 | 33   | 1745 | 32  | 1766 | 33  |
| SU54-078 | 1392 | 1737 | 1.25 | 0.0083 | 0.0002 | 0.0504 | 0.0050 | 0.0578 | 0.0070 | 53   | 1   | 215  | 202  | 57   | 7   | 53   | 1   |
| SU54-079 | 99   | 90   | 0.91 | 0.0004 | 0.0002 | 1.0140 | 0.2047 | 0.0501 | 0.0144 | 2.3  | 1   | 5257 | 281  | 50   | 14  | 2.3  | 1   |
| SU54-080 | 301  | 222  | 0.74 | 0.1668 | 0.0039 | 0.0776 | 0.0010 | 1.7851 | 0.0502 | 994  | 22  | 1137 | 23   | 1040 | 18  | 994  | 22  |
| SU54-082 | 436  | 632  | 1.45 | 0.0001 | 0.0000 | 0.3228 | 0.1574 | 0.0042 | 0.0033 | 0.6  | 0.3 | 3583 | 2611 | 4    | 3   | 0.6  | 0.3 |
| SU54-083 | 128  | 82   | 0.64 | 0.1955 | 0.0045 | 0.0806 | 0.0009 | 2.1710 | 0.0570 | 1151 | 24  | 1210 | 21   | 1172 | 18  | 1210 | 21  |
| SU54-084 | 124  | 100  | 0.80 | 0.2393 | 0.0055 | 0.0895 | 0.0010 | 2.9526 | 0.0762 | 1383 | 29  | 1415 | 20   | 1396 | 20  | 1415 | 20  |
| SU54-085 | 170  | 115  | 0.68 | 0.3286 | 0.0075 | 0.1137 | 0.0012 | 5.1517 | 0.1290 | 1831 | 36  | 1860 | 18   | 1845 | 21  | 1860 | 18  |
| SU54-087 | 329  | 236  | 0.72 | 0.3030 | 0.0069 | 0.1053 | 0.0012 | 4.3991 | 0.1102 | 1706 | 34  | 1719 | 19   | 1712 | 21  | 1719 | 19  |
| SU54-088 | 973  | 32   | 0.03 | 0.1019 | 0.0023 | 0.0605 | 0.0007 | 0.8497 | 0.0216 | 625  | 14  | 622  | 22   | 625  | 12  | 625  | 14  |
| SU54-089 | 303  | 321  | 1.06 | 0.0866 | 0.0020 | 0.0567 | 0.0007 | 0.6767 | 0.0183 | 536  | 12  | 478  | 24   | 525  | 11  | 536  | 12  |
| SU54-090 | 1013 | 86   | 0.08 | 0.2432 | 0.0055 | 0.0894 | 0.0010 | 2.9978 | 0.0726 | 1403 | 29  | 1413 | 19   | 1407 | 18  | 1413 | 19  |



|          |      |     |      |        |        |        |        |         |        |      |     |      |       |      |    |      |     |
|----------|------|-----|------|--------|--------|--------|--------|---------|--------|------|-----|------|-------|------|----|------|-----|
| SU54-091 | 69   | 72  | 1.04 | 0.1236 | 0.0029 | 0.0687 | 0.0011 | 1.1703  | 0.0398 | 751  | 17  | 889  | 31    | 787  | 19 | 751  | 17  |
| SU54-092 | 463  | 564 | 1.22 | 0.0000 | 0.0000 | 0.0261 | 1.0477 | 0.0001  | 0.0041 | 0.2  | 0.3 | -462 | 18588 | 0    | 4  | 0.2  | 0.3 |
| SU54-093 | 1115 | 726 | 0.65 | 0.0816 | 0.0019 | 0.0573 | 0.0006 | 0.6445  | 0.0162 | 506  | 11  | 502  | 22    | 505  | 10 | 506  | 11  |
| SU54-094 | 91   | 157 | 1.72 | 0.0814 | 0.0020 | 0.0618 | 0.0013 | 0.6938  | 0.0270 | 505  | 12  | 668  | 40    | 535  | 16 | 505  | 12  |
| SU54-095 | 753  | 657 | 0.87 | 0.0109 | 0.0003 | 0.0461 | 0.0016 | 0.0692  | 0.0032 | 70   | 2   | 1    | 69    | 68   | 3  | 70   | 2   |
| SU54-096 | 218  | 198 | 0.91 | 0.0798 | 0.0019 | 0.0575 | 0.0008 | 0.6318  | 0.0188 | 495  | 11  | 509  | 31    | 497  | 12 | 495  | 11  |
| SU54-097 | 99   | 95  | 0.96 | 0.1566 | 0.0037 | 0.0713 | 0.0009 | 1.5385  | 0.0454 | 938  | 20  | 965  | 28    | 946  | 18 | 938  | 20  |
| SU54-098 | 126  | 64  | 0.51 | 0.1429 | 0.0033 | 0.0697 | 0.0009 | 1.3734  | 0.0402 | 861  | 19  | 920  | 28    | 878  | 17 | 861  | 19  |
| SU54-099 | 88   | 65  | 0.73 | 0.3599 | 0.0083 | 0.1292 | 0.0015 | 6.4092  | 0.1692 | 1982 | 40  | 2087 | 21    | 2034 | 23 | 2087 | 21  |
| SU54-100 | 100  | 93  | 0.93 | 0.4875 | 0.0113 | 0.1816 | 0.0021 | 12.2072 | 0.3191 | 2560 | 49  | 2668 | 20    | 2620 | 25 | 2668 | 20  |
